# Supplementary material
Source: MDPI journal article supplement (https://www.mdpi.com/1424-8247/15/6/672)
Supplement: s1 [file s1]

# Bio-Oriented Synthesis of Novel (S)-Flurbiprofen Clubbed Hydrazone Schiff's Bases for Diabetic Management: In Vitro and In Silico Studies

Aftab Alam <sup>1</sup>, Mumtaz Ali <sup>1</sup>, Najeeb Ur Rehman <sup>2,\*</sup>, Saeed Ullah <sup>2,3</sup>,  
Sobia Ahsan Halim <sup>2</sup>, Abdul Latif <sup>1</sup>, Zainab <sup>4</sup>, Ajmal Khan <sup>2</sup>, Obaid Ullah <sup>2</sup>,  
Shujaat Ahmad <sup>5</sup>, Ahmed Al-Harrasi <sup>2,\*</sup> and Manzoor Ahmad <sup>1,\*</sup>

<sup>1</sup> Department of Chemistry, University of Malakand, Dir Lower P.O. Box 18800, Khyber Pakhtunkhwa, Pakistan; aftab.alam@uom.edu.pk (A.A.); mumtazali@uom.edu.pk (M.A.); drlatif2016@gmail.com (A.L.)

<sup>2</sup> Natural and Medical Sciences Research Center, University of Nizwa, PC 616, Birkat Al Mauz, Nizwa P.O. Box 33, Oman; saidkhan@unizwa.edu.om (S.U.); sobia\_halim@unizwa.edu.om (S.A.H.); ajmalkhan@unizwa.edu.om (A.K.); obaidullah@unizwa.edu.om (O.U.)

<sup>3</sup> Husein Ebrahim Jamal Research Institute of Chemistry, International Center for Chemical and Biological Sciences, University of Karachi, Karachi 75270, Sindh, Pakistan

<sup>4</sup> College of Chemistry and Materials Science, Hebei Normal University, Shijiazhuang 050024, China; abidkhan4199@gmail.com

<sup>5</sup> Department of Pharmacy, Shaheed Benazir Bhutto University Sheringal, Dir Upper P.O. Box 18800, Khyber Pakhtunkhwa, Pakistan; shujaat@sbbu.edu.pk

\* Correspondence: najeeb@unizwa.edu.om (N.U.R.); aharrasi@unizwa.edu.om (A.A.-H.); manzoorahmad@uom.edu.pk (M.A.)

**Abstract:** A new series of flurbiprofen derivatives (**4a–4p**) and (**5a–5n**) were synthesized with different aromatic or aliphatic aldehydes and ketones to produce Schiff's bases and their structures were confirmed through HR-ESI-MS, <sup>1</sup>H and <sup>13</sup>C-NMR spectroscopy. The  $\alpha$ -glucosidase inhibitory activities of the newly synthesized compounds were scrutinized, in which six compounds **5k**, **4h**, **5h**, **4d**, **4b** and **5i** showed potent inhibition in the range of 0.93 to 10.26  $\mu$ M, respectively, whereas fifteen compounds **4c**, **4g**, **4i**, **4j**, **4l**, **4m**, **4o**, **4p**, **5c**, **5d**, **5j**, **5l**, **5m**, **5n** and **1** exhibited significant inhibitory activity with IC<sub>50</sub> in range of = 11.42 to 48.39  $\mu$ M. In addition, compounds **5g**, **5f**, **4k**, **4n**, and **4f** displayed moderate-to-low activities. The modes of binding of all the active compounds were determined through molecular docking approach which revealed that two residues, specifically Glu277 and His351 are important in the stabilization of the active compounds in the active site of  $\alpha$ -glucosidase. Furthermore, these compounds block the active site with high binding energies (–7.51 to –3.36 kcal/mol) thereby inhibiting the function of the enzyme.

**Keywords:** (S)-flurbiprofen; Schiff's bases;  $\alpha$ -glucosidase inhibition; molecular docking

Dr. Najeeb/AFT-3o/CDC13  
PROTON

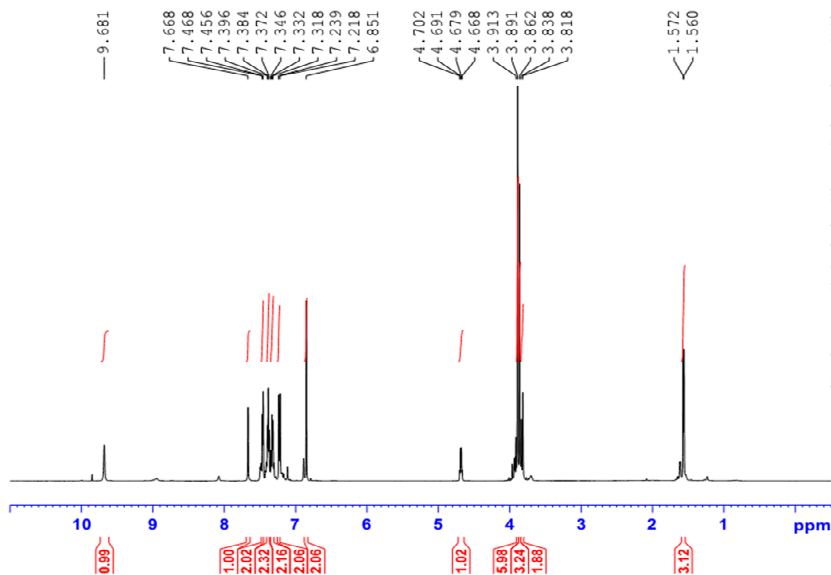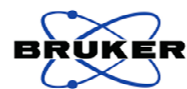

Current Data Parameters  
NAME 29-Mar-2021 Dr. Najeeb  
EXPRO 29  
PROCNO 1

F2 - Acquisition Parameters  
Date\_ 20210329  
Time 21.01  
INSTRUM spect  
PROBHD 5 mm PABBO BB/  
PULPROG zg30  
TD 65536  
SOLVENT CDC13  
NS 16  
DS 2  
SWH 12019.230 Hz  
FIDRES 0.183399 Hz  
AQ 2.7262976 sec  
RG 70.11  
DW 41.600 usec  
DE 6.50 usec  
TE 298.2 K  
D1 1.00000000 sec  
TD0 1

----- CHANNEL f1 -----  
SF01 600.1537063 MHz  
NUC1 1H  
P1 10.90 usec  
PLW1 22.60000000 W

F2 - Processing parameters  
SI 65536  
SF 600.1500266 MHz  
WDW EM  
SSB 0  
LB 0.30 Hz  
GB 0  
PC 1.00

Dr. Najeeb/AFT-3o/CDC13  
C13CPD

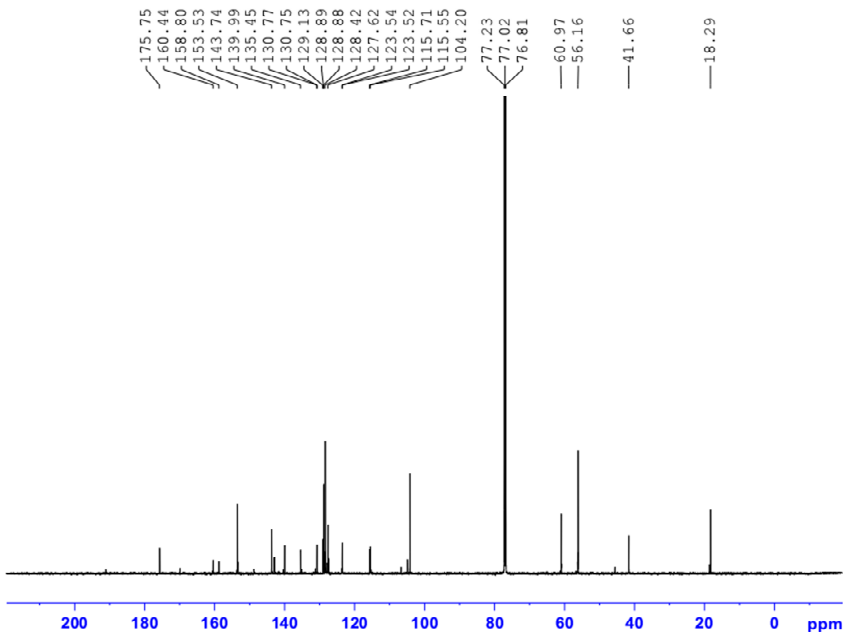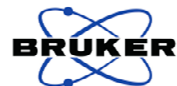

Current Data Parameters  
NAME 29-Mar-2021 Dr. Najeeb  
EXPRO 30  
PROCNO 1

F2 - Acquisition Parameters  
Date\_ 20210329  
Time 22.27  
INSTRUM spect  
PROBHD 5 mm PABBO BB/  
PULPROG zgpg30  
TD 32768  
SOLVENT CDC13  
NS 1048  
DS 4  
SWH 36057.691 Hz  
FIDRES 1.100393 Hz  
AQ 0.4513829 sec  
RG 195.2  
DW 13.867 usec  
DE 6.50 usec  
TE 298.2 K  
D1 2.00000000 sec  
D11 0.03000000 sec  
TD0 1

----- CHANNEL f1 -----  
SF01 150.9229276 MHz  
NUC1 13C  
P1 11.60 usec  
PLW1 83.00000000 W

----- CHANNEL f2 -----  
SF02 600.1524006 MHz  
NUC2 1H  
CPDPRG2 waltz16  
IC102 70.00 usec  
PLW2 22.60000000 W  
PLW12 0.52804000 W  
PLW13 0.25874999 W

F2 - Processing parameters  
SI 32768  
SF 150.9078389 MHz  
WDW EM  
SSB 0  
LB 1.00 Hz  
GB 0  
PC 1.40





176.05  
158.93  
148.69  
142.43  
140.84  
135.50  
135.45  
132.54  
130.84  
130.82  
129.89  
128.90  
128.89  
128.41  
127.69  
127.61  
124.45  
123.92  
121.64  
115.40  
115.24  
77.22  
77.01  
76.80  
41.66  
18.37

[illegible]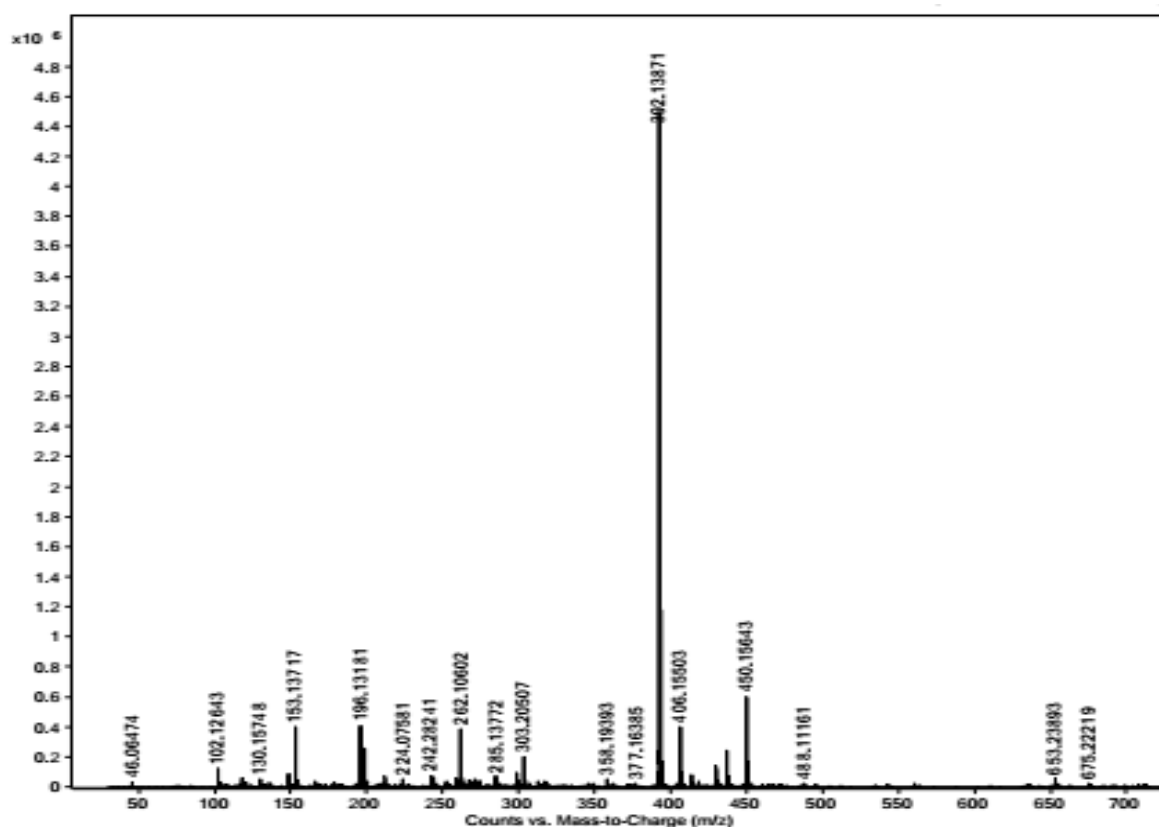

4

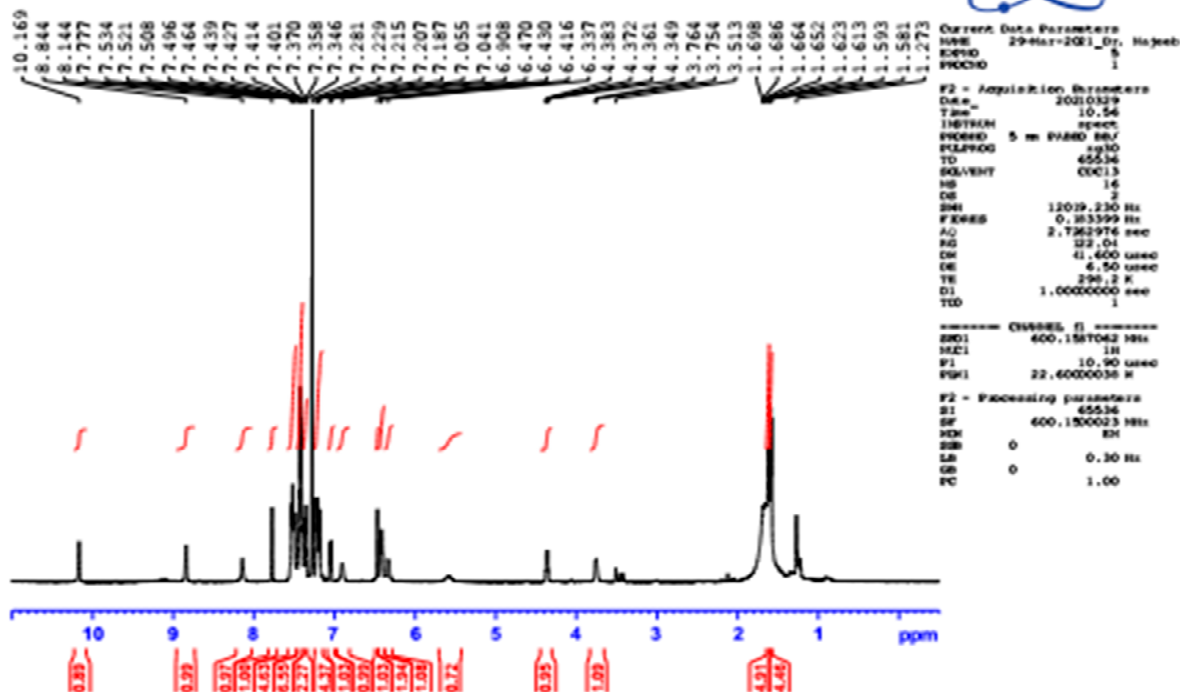

Obaidullah / Dr. Najeeb / AFT-3d / CDC13 + DMSO  
C13CPD

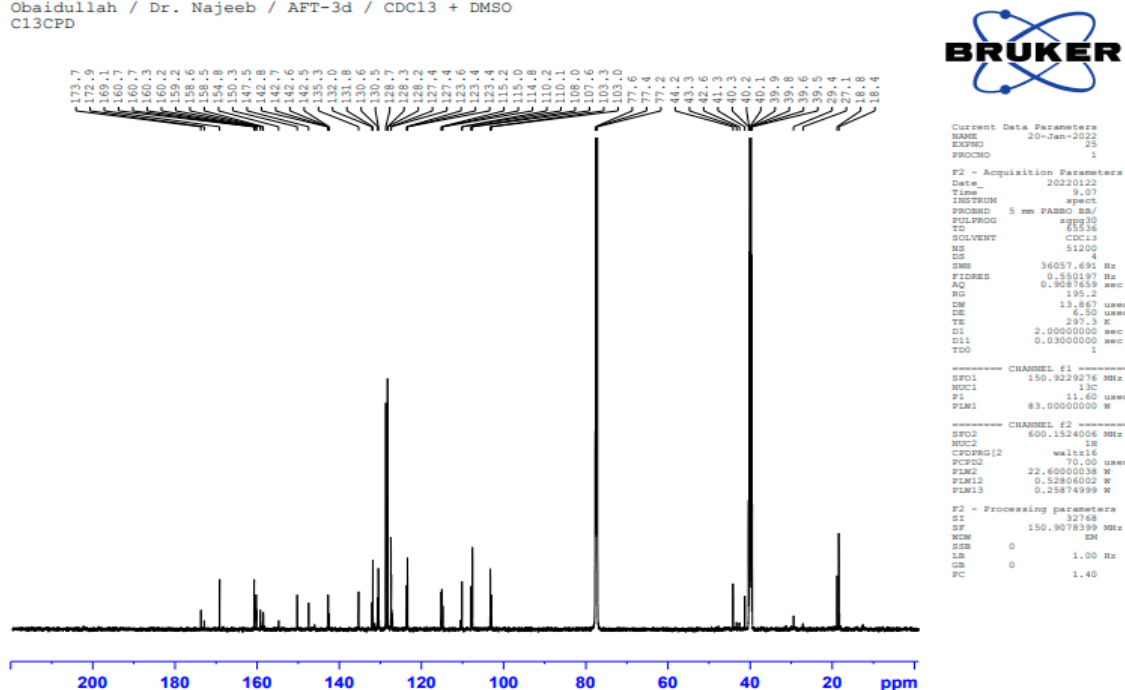

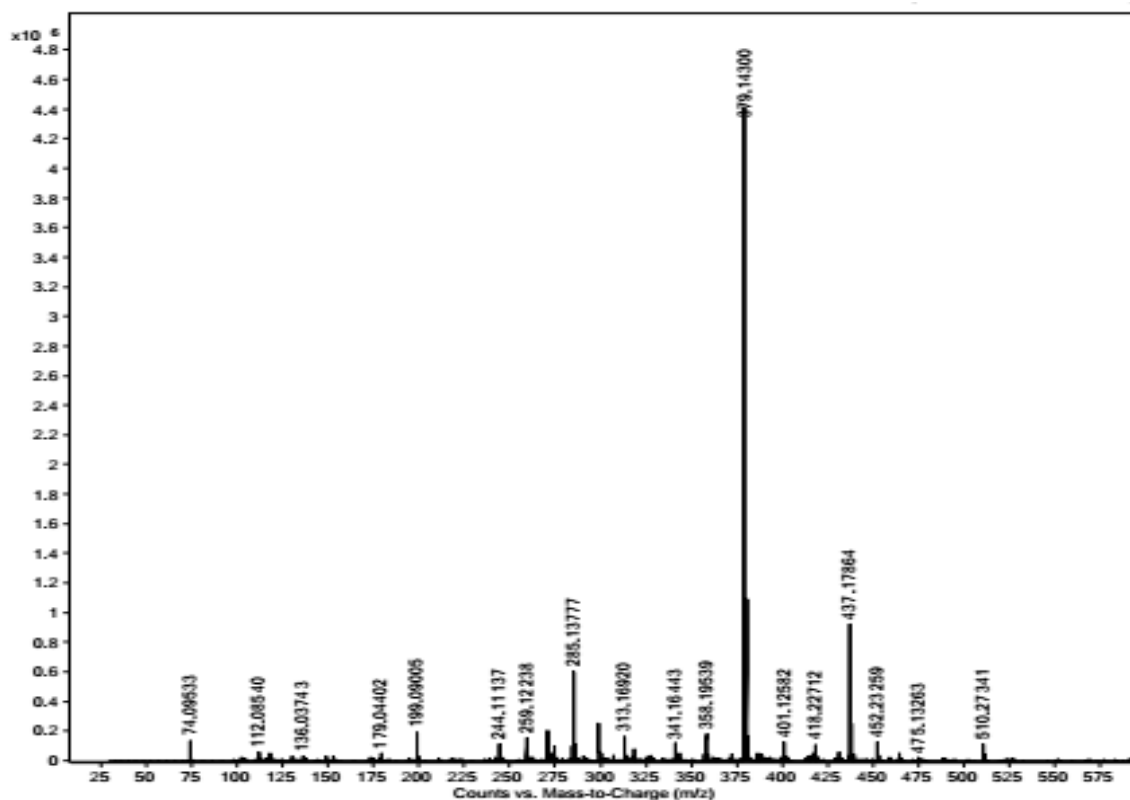

Figure S3:  $^1\text{H}$ ,  $^{13}\text{C}$  NMR and HRMS (ESI $^+$ ) of compound 4c

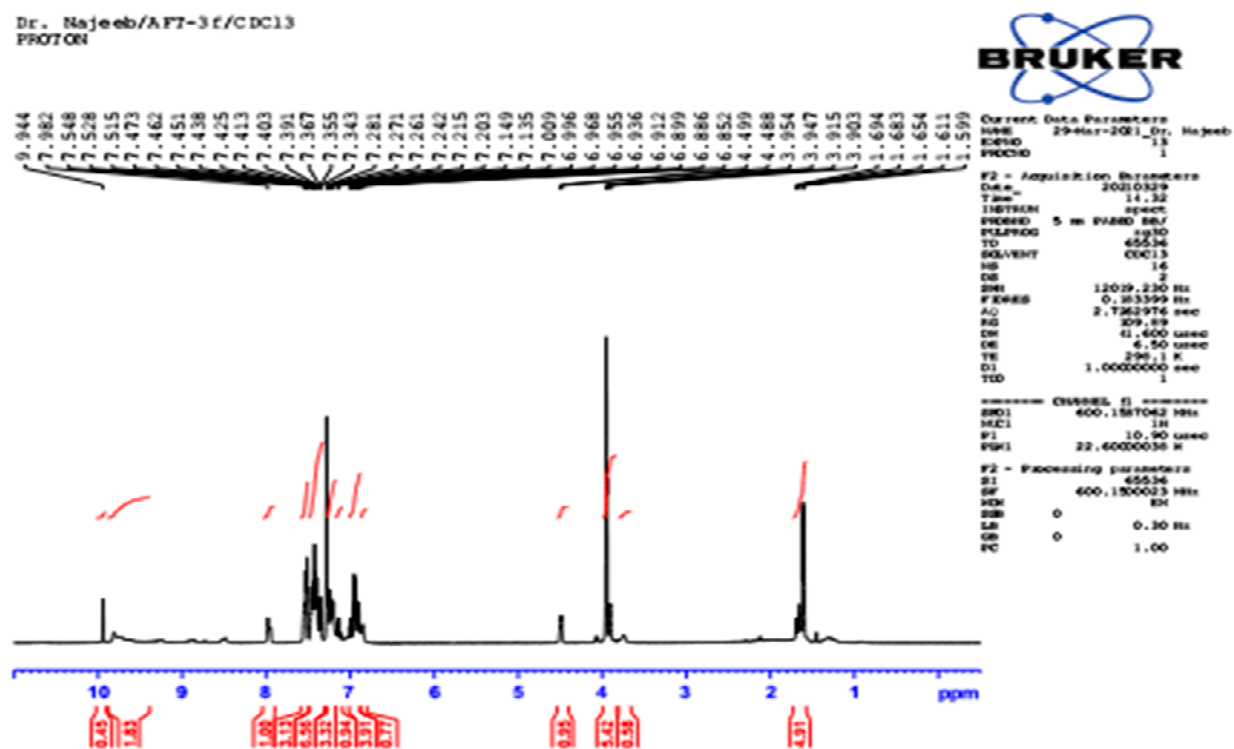

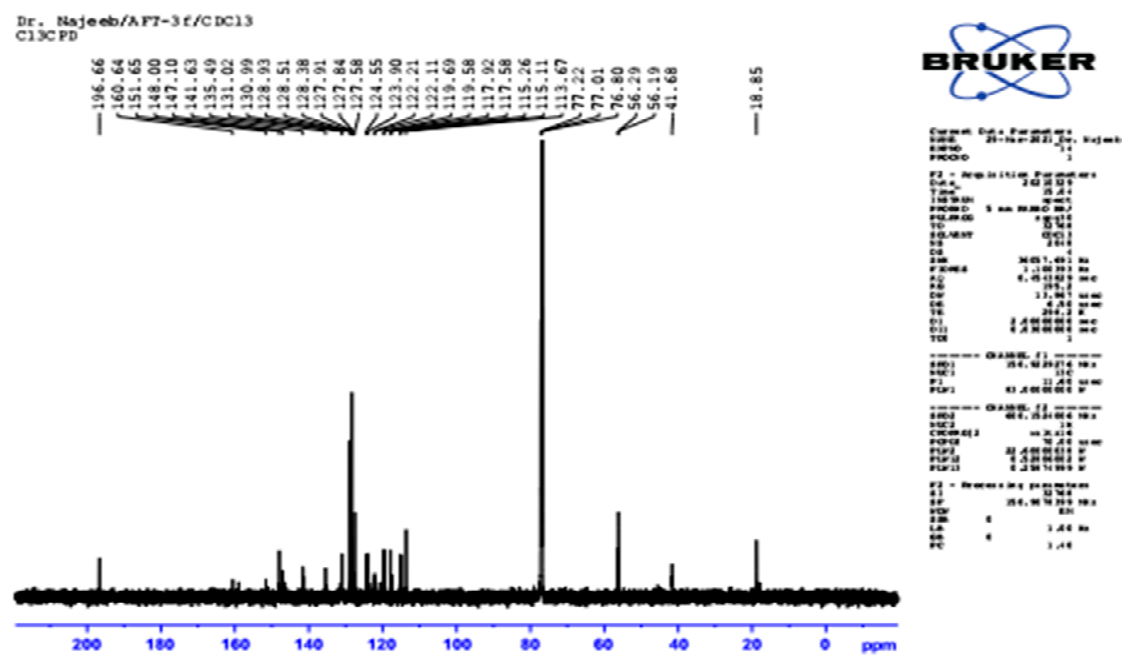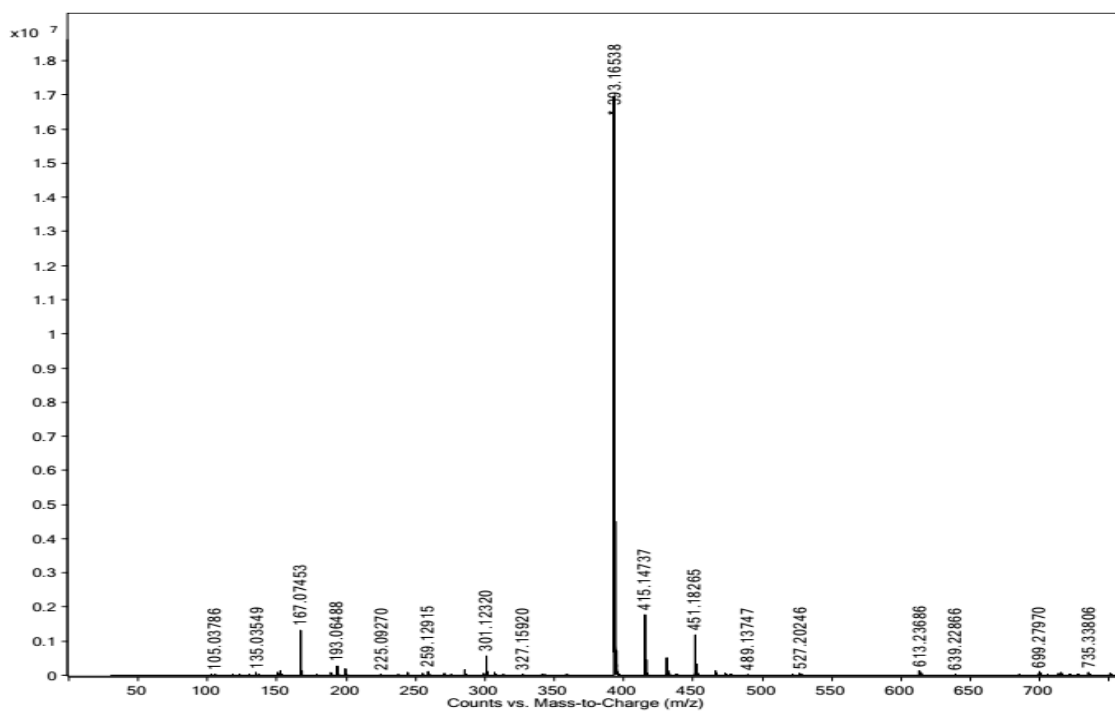

**Figure S4:** <sup>1</sup>H, <sup>13</sup>C NMR and HRMS (ESI<sup>+</sup>) of compound **4d**



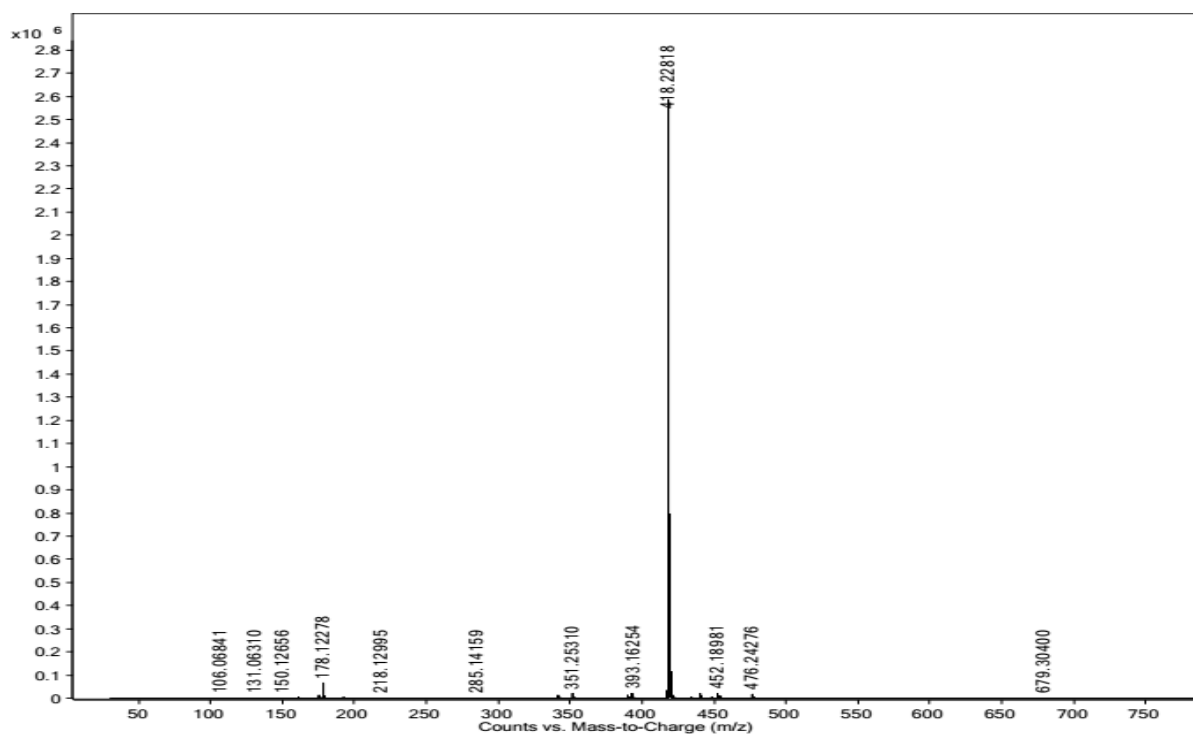

**Figure S5:** <sup>1</sup>H, <sup>13</sup>C NMR and HRMS (ESI<sup>+</sup>) of compound 4e

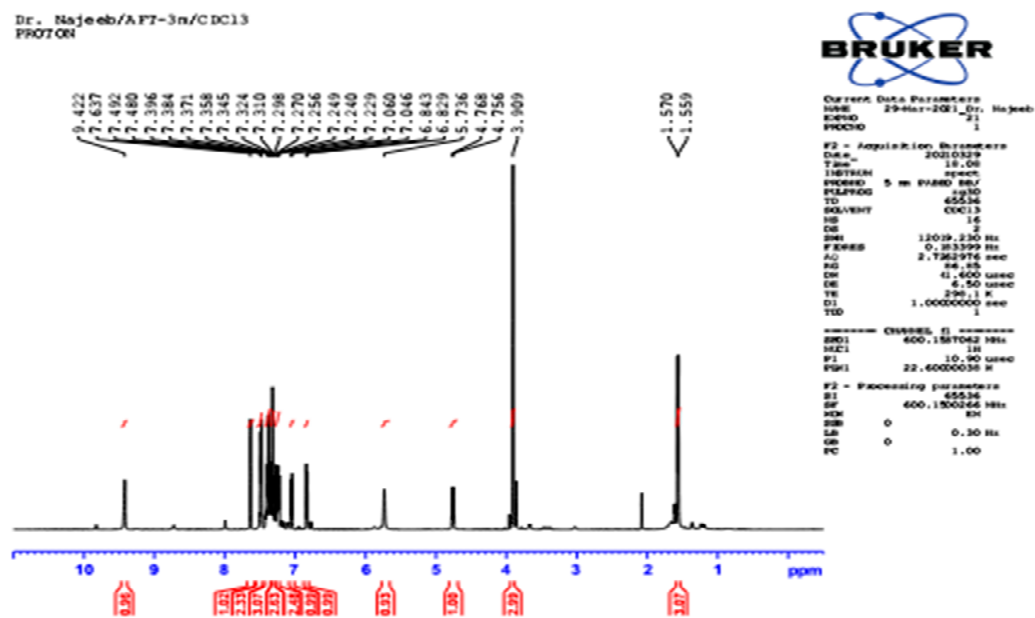









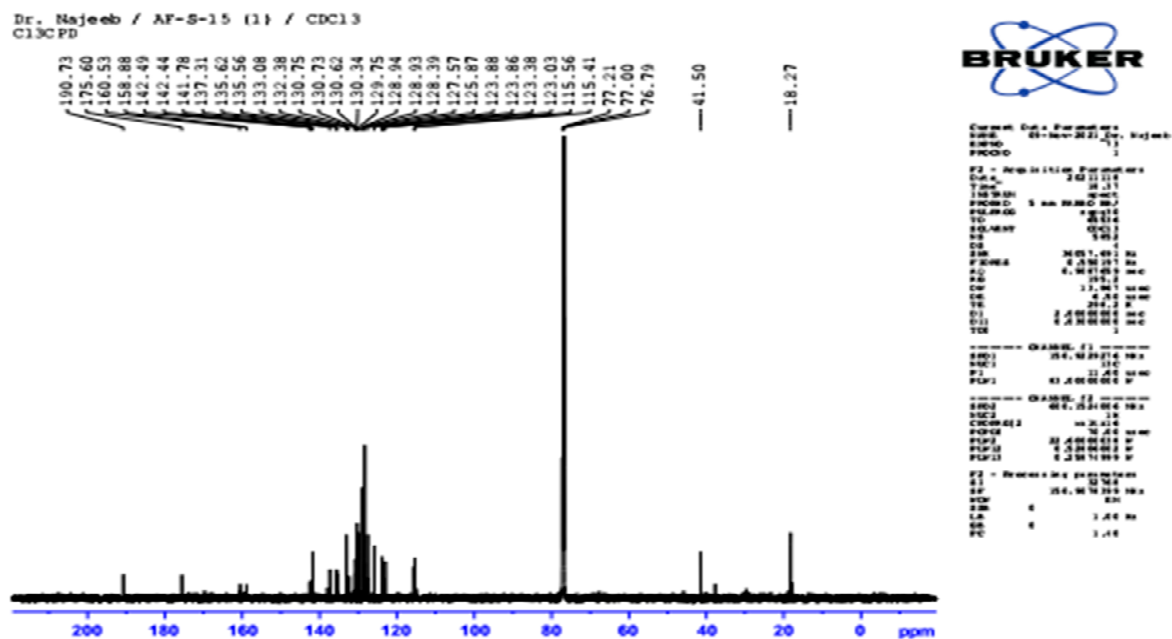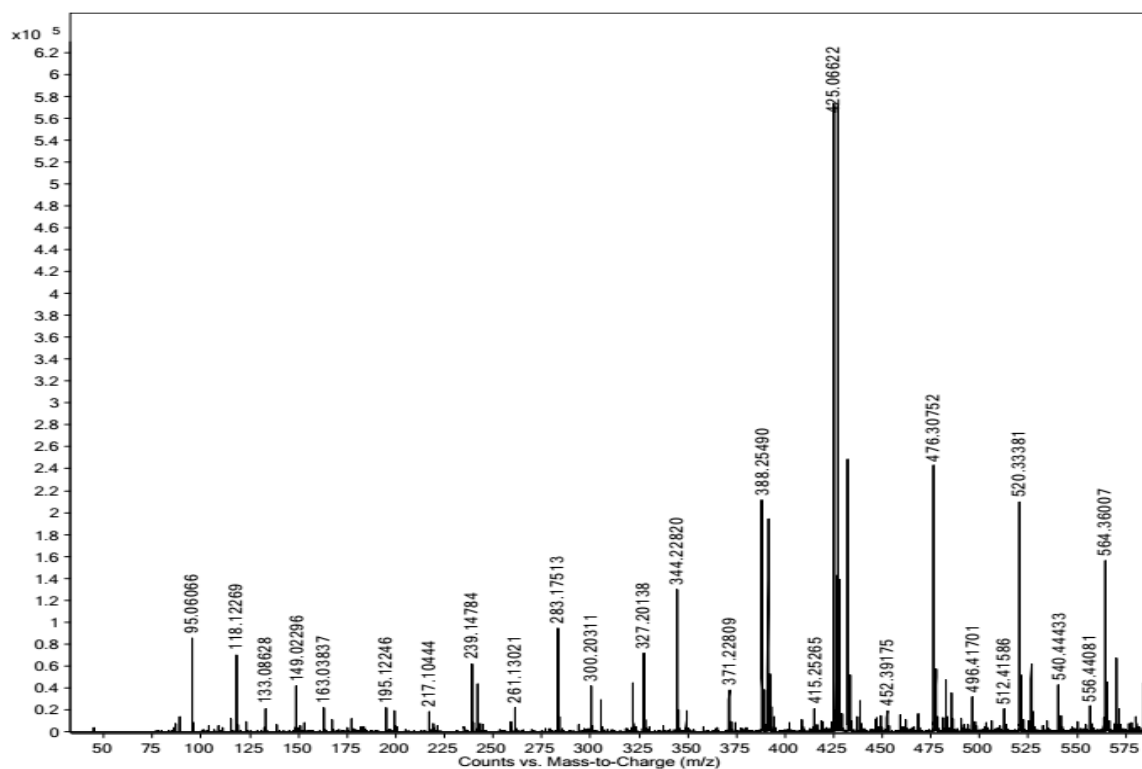

**Figure S8:** <sup>1</sup>H, <sup>13</sup>C NMR and HRMS (ESI<sup>+</sup>) of compound **4h**





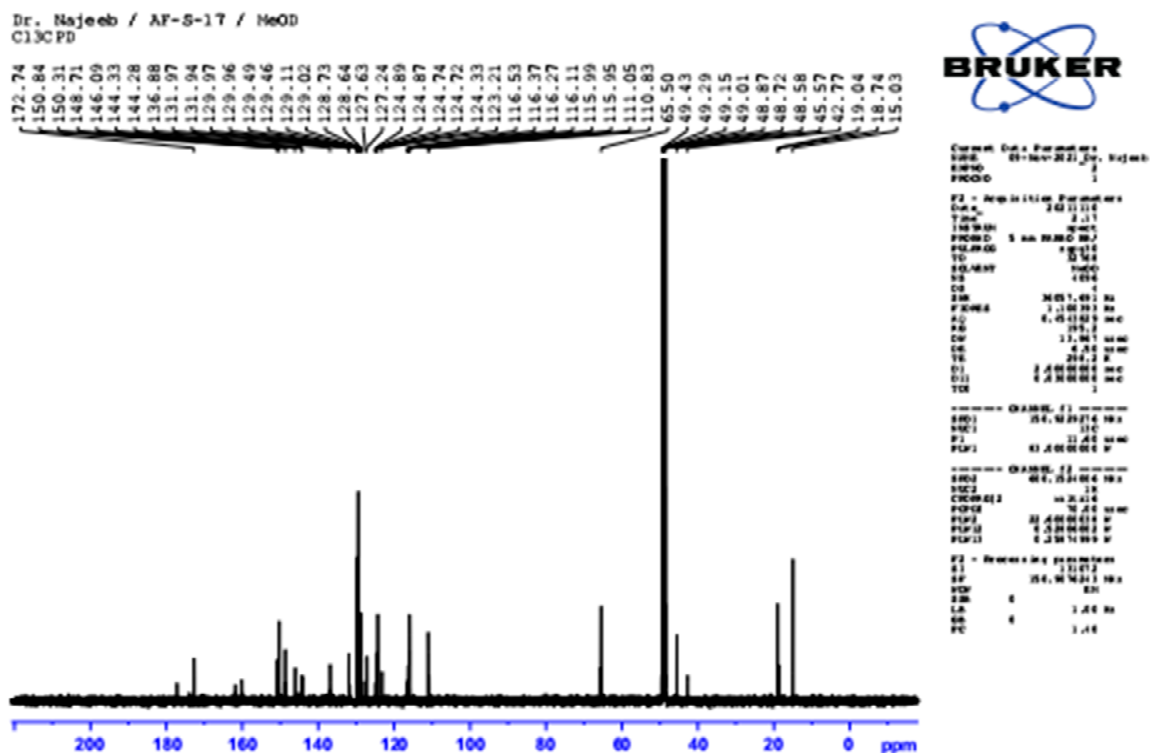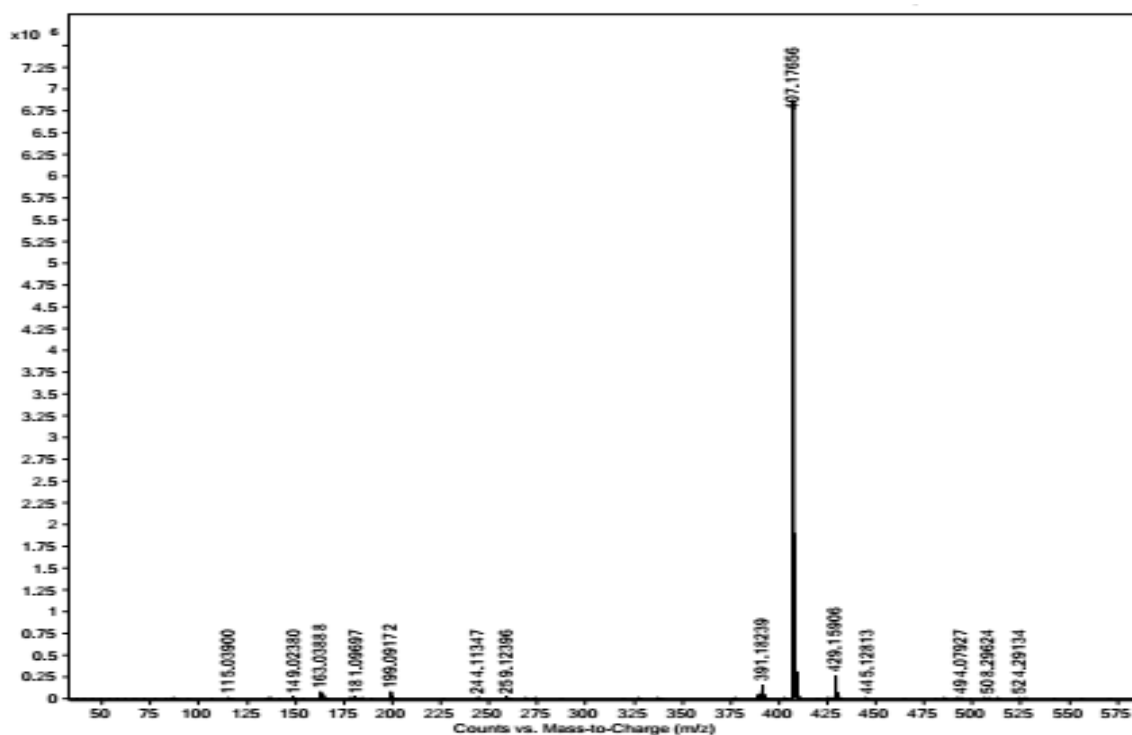

Figure S10:  $^1\text{H}$ ,  $^{13}\text{C}$  NMR and HRMS ( $\text{ESI}^+$ ) of compound **4j**

Dr. Najeeb / AF-5-18 / MeOD  
PROTON

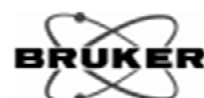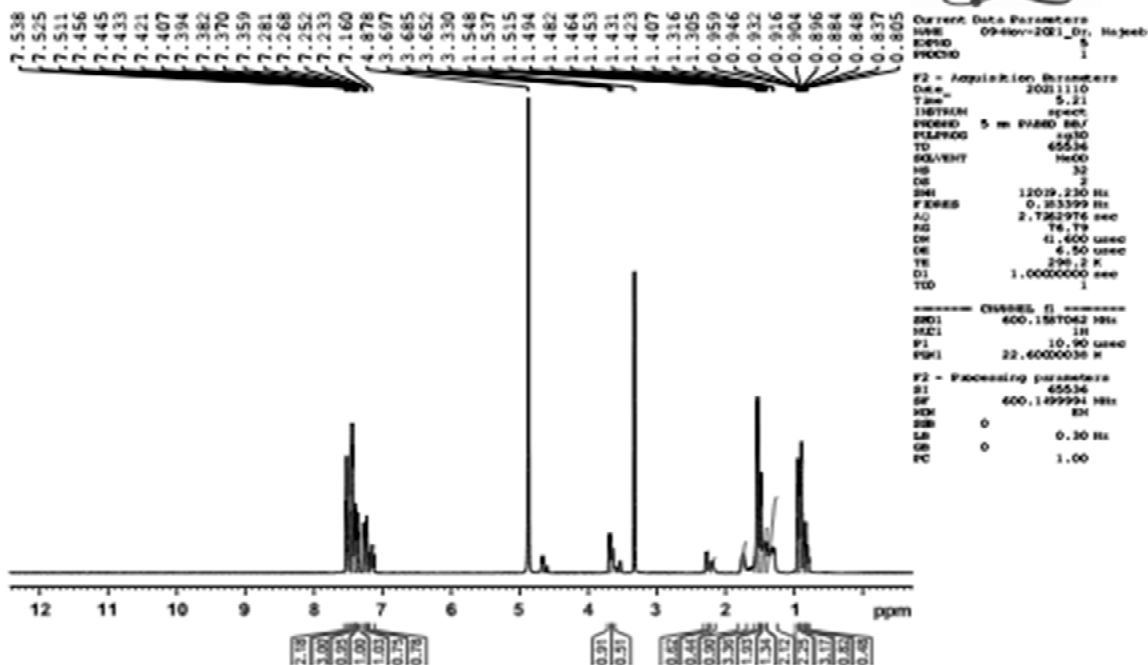

Dr. Najeeb / AF-5-18 / MeOD  
C13C PD

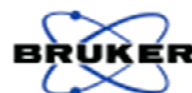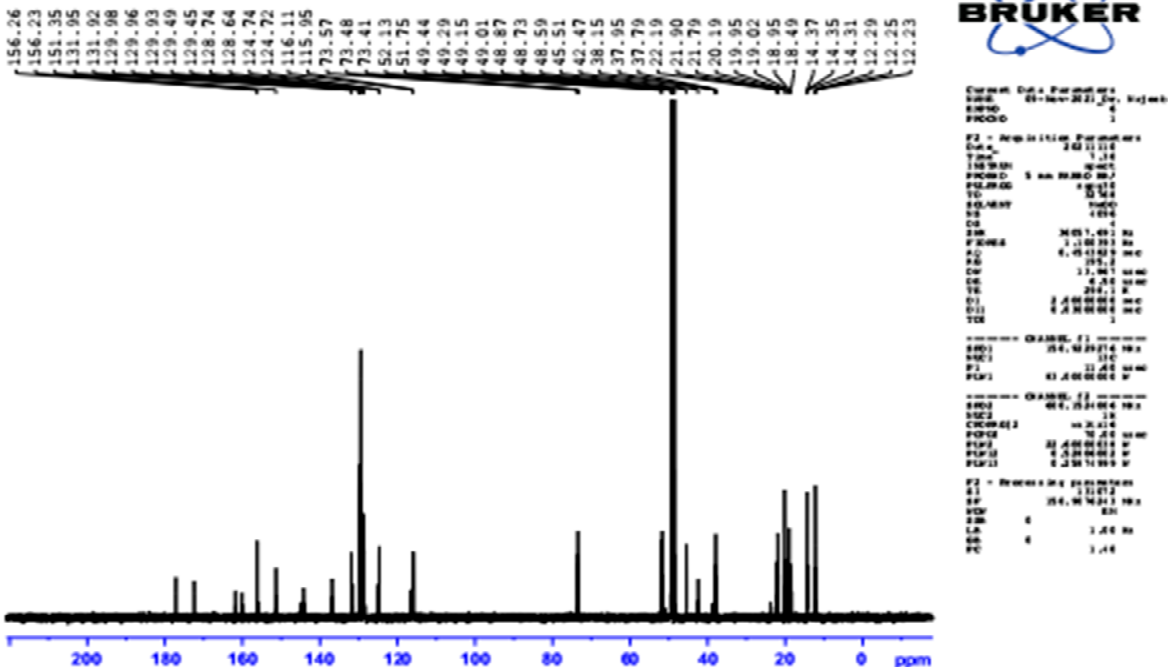





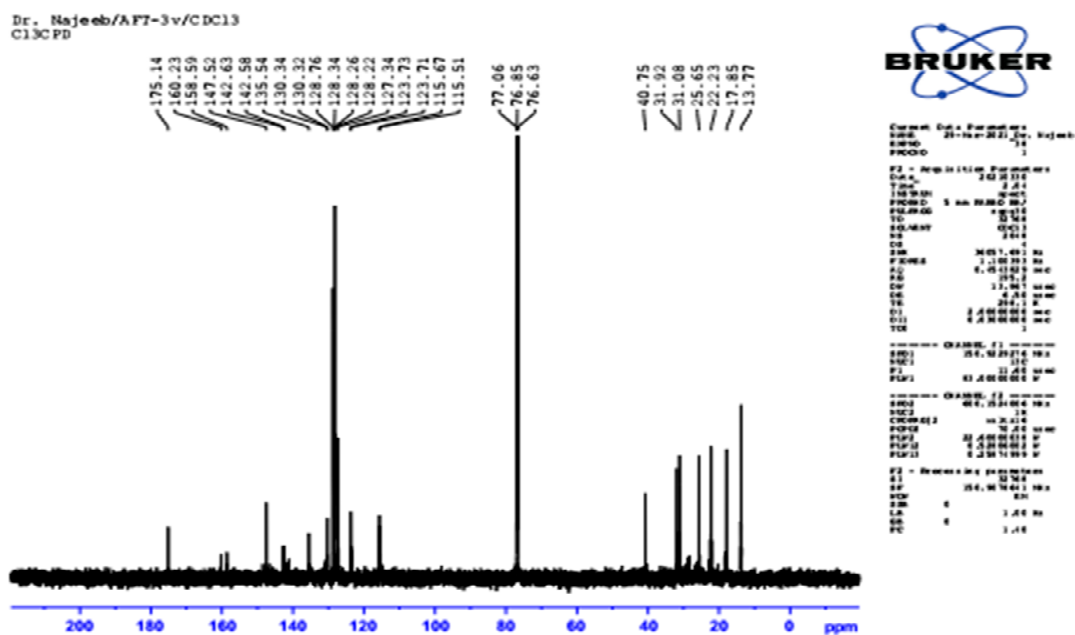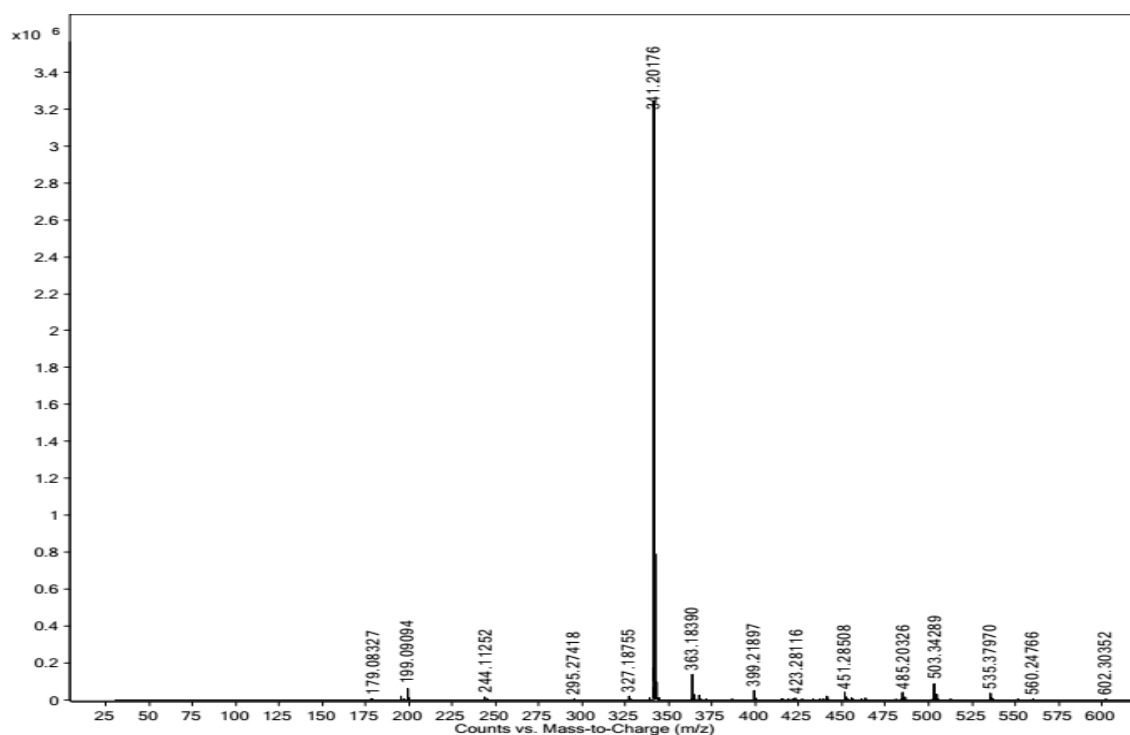

**Figure S12:** <sup>1</sup>H, <sup>13</sup>C NMR and HRMS (ESI<sup>+</sup>) of compound **41**





Dr. Najeeb/AT7-3y/CDC13  
 13C NMR

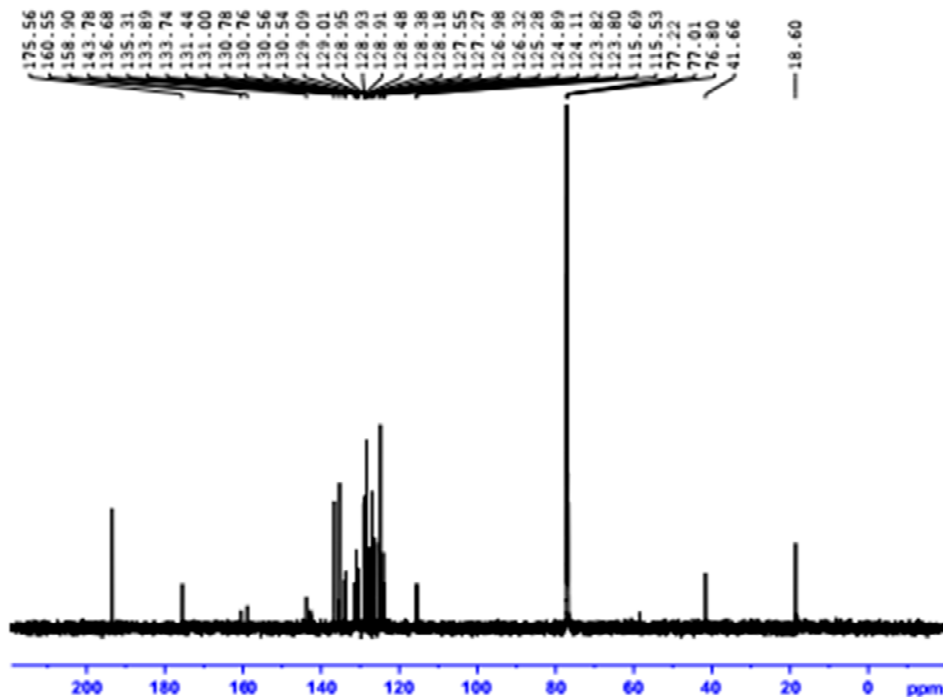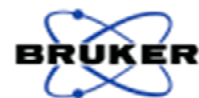

Current Date: 20-10-2021 Dr. Najeeb  
 Sample: 4n  
 PROB: 1  
 P1 = Acquisition Parameters  
 Date\_: 20-10-2021  
 Time: 11:44  
 INSTRUM: spect  
 PROCNO: 5 Run: 10000000  
 F2: 100.625 MHz  
 F1: 500.136 MHz  
 SOLVENT: CDCl3  
 NS: 2048  
 DS: 4  
 SWH: 30511.401 Hz  
 FWHM: 1.100 Hz  
 AQ: 0.00000000 sec  
 RG: 327.2  
 CF: 11.961 Hz/sec  
 CB: 6.200 Hz/sec  
 TB: 258.2 Hz  
 D1: 2.00000000 sec  
 D11: 0.00000000 sec  
 TD: 1  
 ===== CHANNEL f1 =====  
 NUCL1: 13C  
 NUC2: 13C  
 P1P2: 0.00000000 sec  
 ===== CHANNEL f2 =====  
 NUCL1: 1H  
 NUC2: 1H  
 CHRGD1: 1  
 CHRGD2: 1  
 P1P2: 0.00000000 sec  
 P1P3: 0.00000000 sec  
 P1P4: 0.00000000 sec  
 P1P5: 0.00000000 sec  
 P2 = Processing parameters  
 SI: 32768  
 SF: 100.625 MHz  
 WDW: EM  
 LB: 3.00 Hz  
 GB: 0  
 PC: 1.00

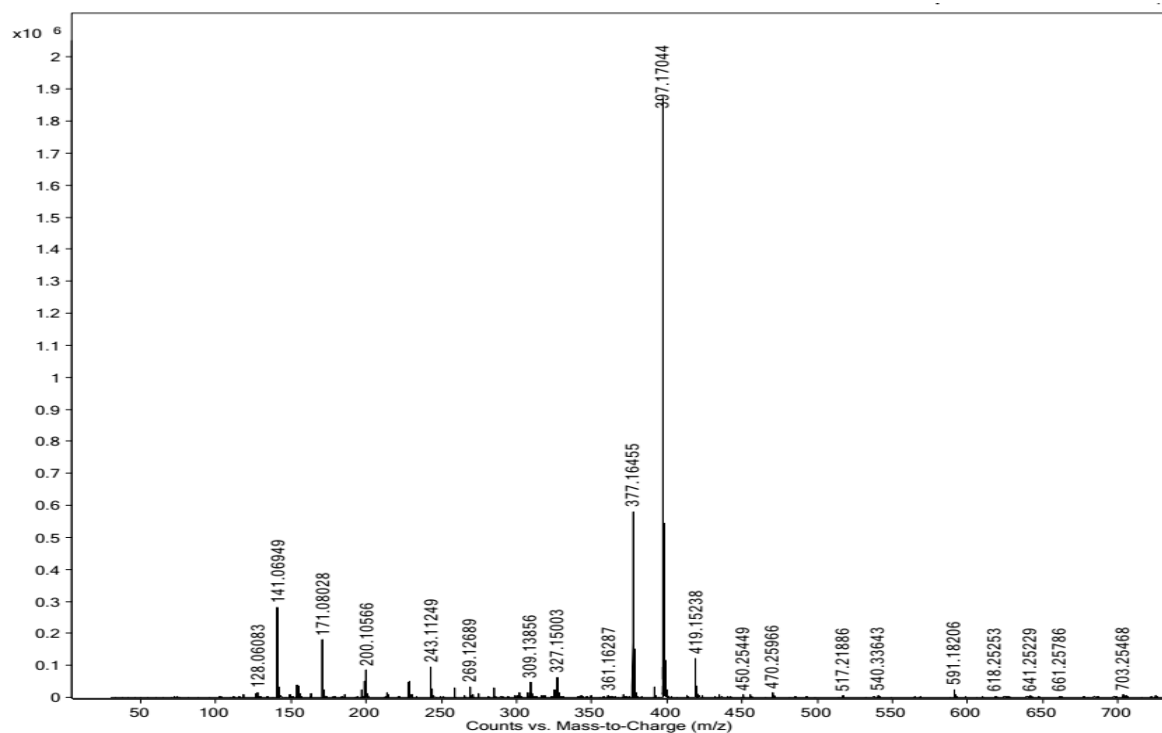

Figure S14:  $^1\text{H}$ ,  $^{13}\text{C}$  NMR and HRMS ( $\text{ESI}^+$ ) of compound **4n**



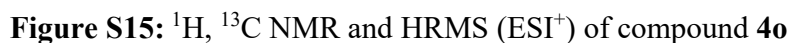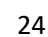

Dr. Najeeb / AF-S-28 / MeOD  
C13CPD

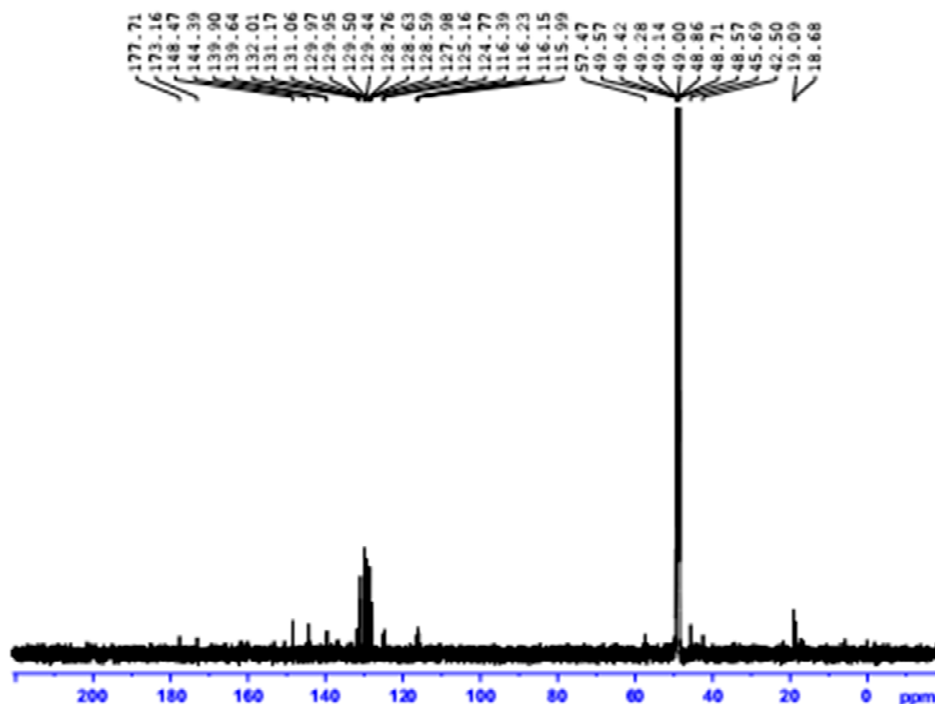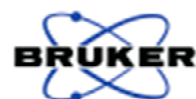

Current: Exp 4: Parameters  
Date: 03-Nov-2021, Dr. Najeeb  
EXPNO: 34  
PROCNO: 1

F2 - Acq in 13C Parameters  
Date\_: 03-11-21  
Time\_: 21:33  
INSTRUM: spect  
PROBHD: 5 mm MMCO 1H/1  
PULPROG: zgpg30  
TD: 65536  
SOLVENT: MeOD  
NS: 3441  
DS: 4  
SWH: 36051.491 Hz  
FREQ: 125.761 MHz  
AQ: 6.961493 sec  
RG: 256.0  
CF: 11.961 sec  
CQ: 4.33 sec  
TQ: 204.1 sec  
D1: 2.0000000 sec  
D11: 6.0000000 sec  
TMR: 1

===== CHANNEL f1 =====  
NUC1: 13C, 101.626 MHz  
P1: 12.00 sec  
PLP1: 0.0000000 sec

===== CHANNEL f2 =====  
NUC2: 1H, 500.136 MHz  
CROSSP: 2  
PCPD2: 0.0000000 sec  
PLP2: 0.0000000 sec  
PLP12: 0.0000000 sec

F2 - Processed 13C parameters  
SI: 32768  
SF: 125.761 MHz  
WDW: EM  
SSB: 0  
LB: 3.00 Hz  
GB: 0  
PC: 1.00

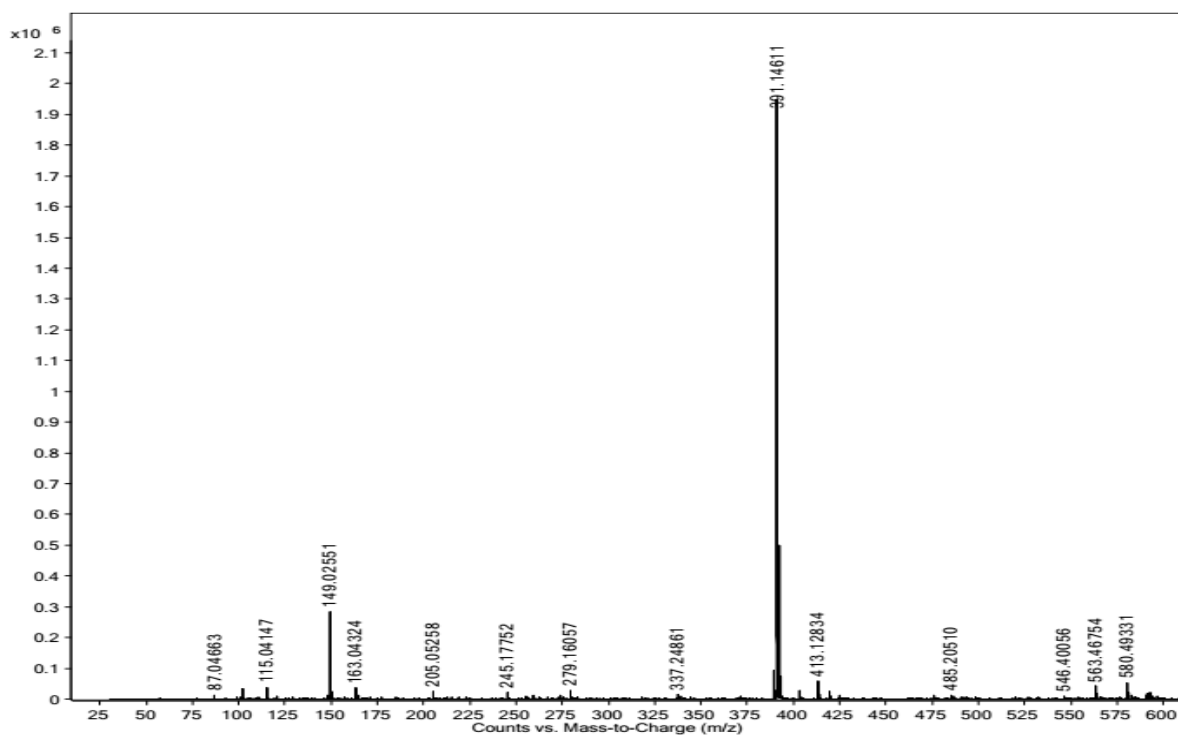

Figure S16:  $^1\text{H}$ ,  $^{13}\text{C}$  NMR and HRMS ( $\text{ESI}^+$ ) of compound **4p**

Dr. Najeeb/AF-K-I/CDC13  
PROTON

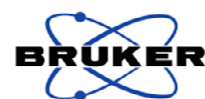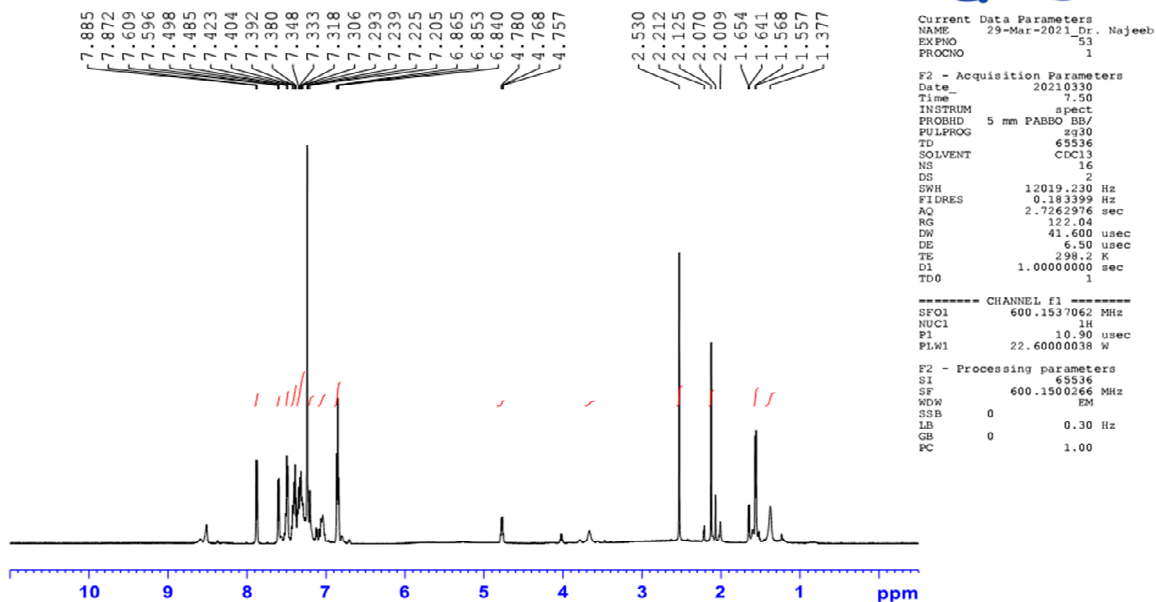

Dr. Najeeb/AF-K-I/CDC13  
C13CPD

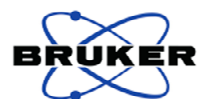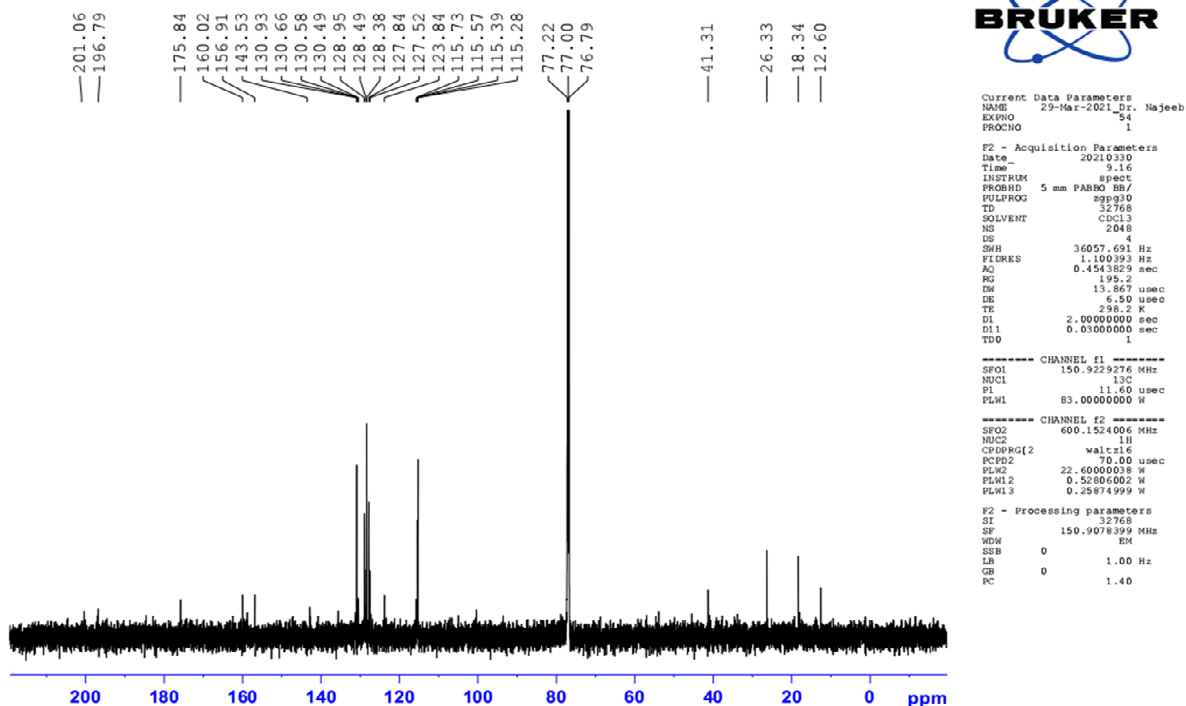



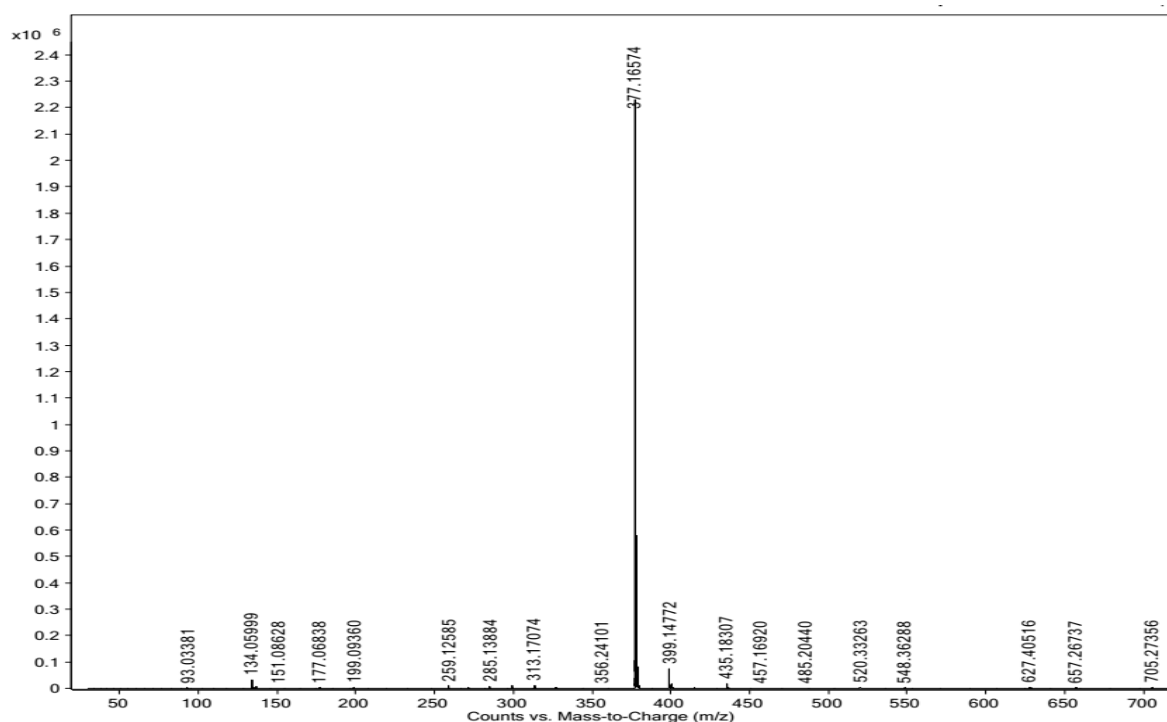

**Figure S17.** <sup>1</sup>H, <sup>13</sup>C NMR and HRMS (ESI<sup>+</sup>) of compound **5a**

Dr. Najeeb/AF-K-III/CDC13  
PROTON

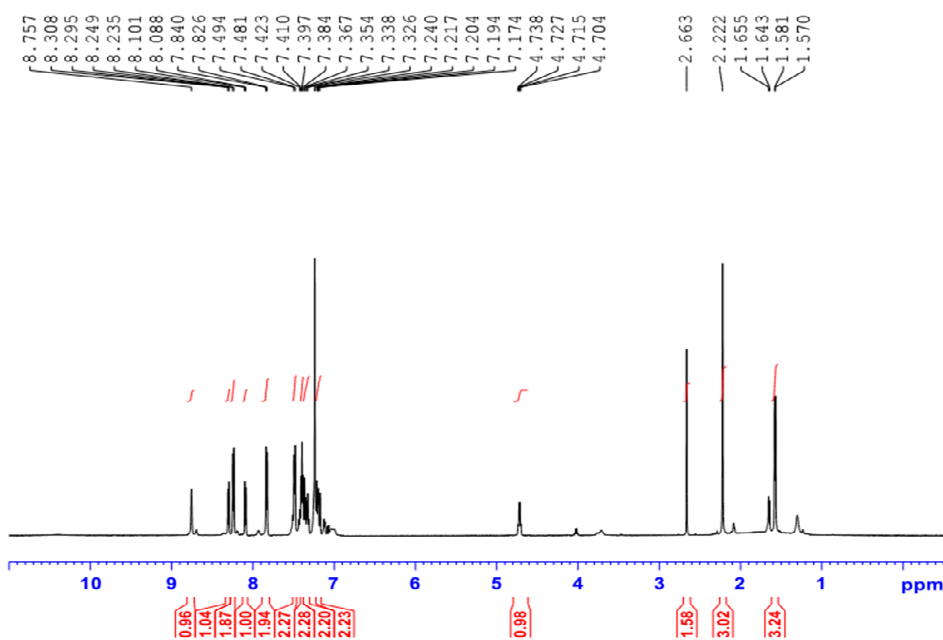

**BRUKER**

Current Data Parameters  
NAME 29-Mar-2021 Dr. Najeeb  
EXFNO 57  
PROCNO 1

F2 - Acquisition Parameters  
Date 20210330  
Time 9.38  
INSTRUM spect  
PROBHD 5 mm PARBO BB/  
PULPROG zg30  
TD 65536  
SOLVENT CDCl3  
NS 16  
DS 2  
SWH 12019.230 Hz  
FIDRES 0.183399 Hz  
AQ 2.7262976 sec  
RG 122.04  
DW 41.600 usec  
DE 6.50 usec  
TE 298.2 K  
D1 1.00000000 sec  
TD0 1

----- CHANNEL f1 -----  
SFO1 600.1537062 MHz  
NUC1 1H  
P1 10.90 usec  
PLW1 22.60000038 W

F2 - Processing parameters  
SI 65536  
SF 600.1500266 MHz  
WDW EM  
SSB 0  
LB 0.30 Hz  
GB 0  
PC 1.00

Dr. Najeeb/AF-K-III/CDC13  
C13CPD

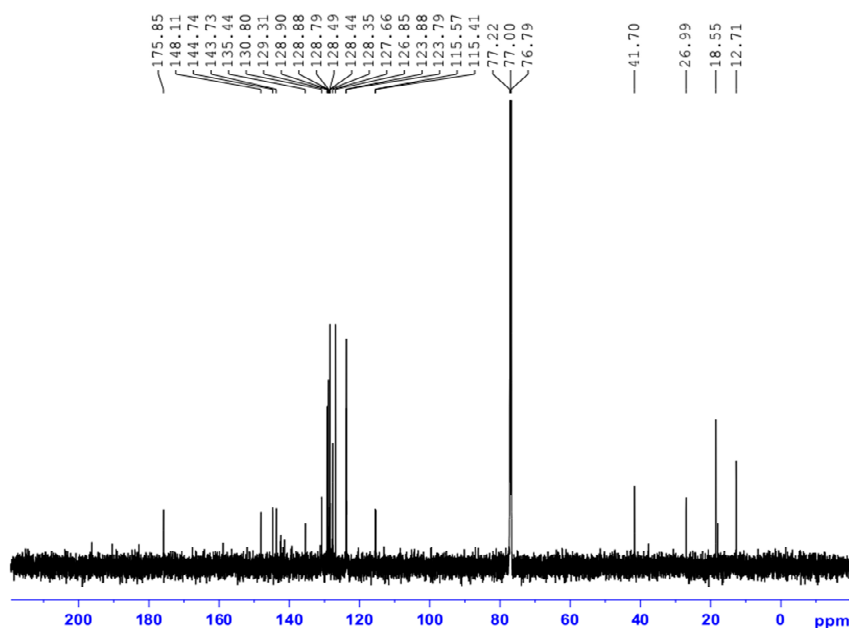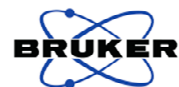

Current Data Parameters  
NAME 29-Mar-2021\_Dr. Najeeb  
EXPNO 58  
PROCNO 1

F2 - Acquisition Parameters  
Date\_ 20210330  
Time\_ 11.04  
INSTRUM spect  
PROBHD 5 mm PABBO BB/  
PULPROG zgpg30  
TD 32768  
SOLVENT CDCl3  
NS 2048  
DS 4  
SWH 36057.691 Hz  
FIDRES 1.100393 Hz  
AQ 0.4341829 sec  
RG 199.2  
DM 13.967 usec  
DE 6.150 usec  
TE 298.2 K  
D1 2.00000000 sec  
D11 0.03000000 sec  
TSD 1

----- CHANNEL f1 -----  
SFO1 150.9229276 MHz  
NUC1 13C  
P1 11.60 usec  
PLW1 83.00000000 W

----- CHANNEL f2 -----  
SFO2 600.1324006 MHz  
NUC2 1H  
CPDPRG2 waltz16  
PCPD2 70.00 usec  
PLW2 22.00000038 W  
PLW3 0.52506502 W  
PLW3 0.25874999 W

F2 - Processing parameters  
SI 32768  
SF 150.9078399 MHz  
WDW EM  
SSB 0  
LB 1.00 Hz  
GB 0  
PC 1.40

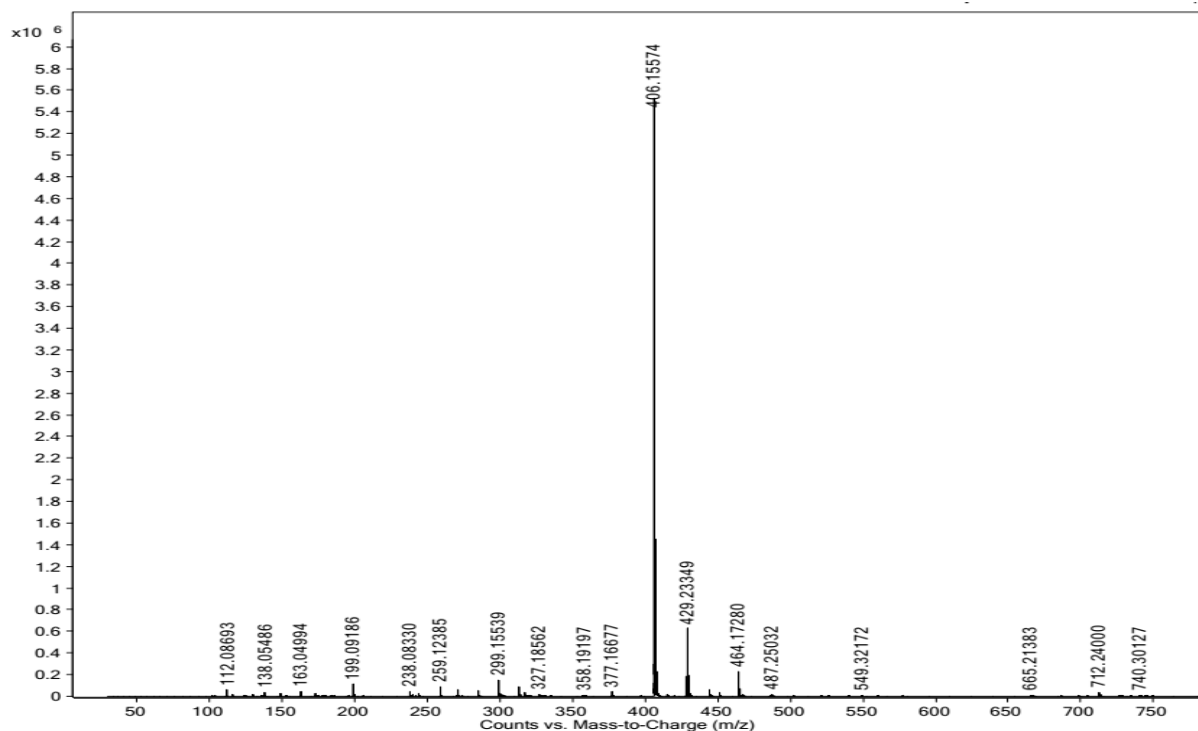

Figure S18:  $^1\text{H}$ ,  $^{13}\text{C}$  NMR and HRMS ( $\text{ESI}^+$ ) of compound **5b**

Dr. Najeeb/AF-K-IV/CDC13  
PROTON

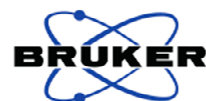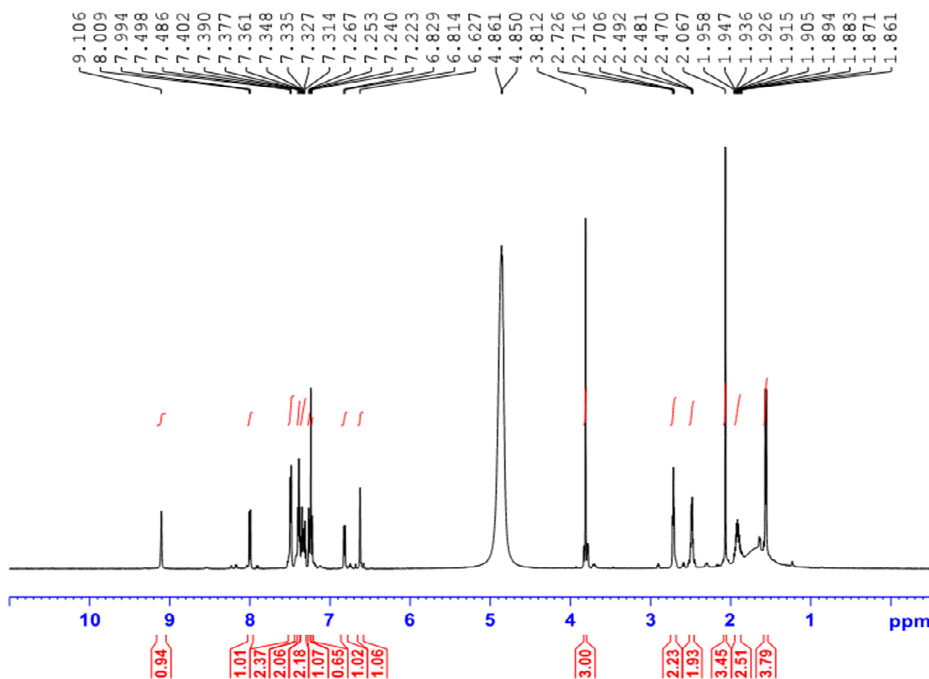

Current Data Parameters  
NAME 29-Mar-2021\_Dr. Najeeb  
EXPNO 61  
PROCNO 1

F2 - Acquisition Parameters  
Date 20210330  
Time 11.26  
INSTRUM spect  
PROBHD 5 mm PABBO BB/  
PULPROG zg30  
TD 65536  
SOLVENT CDC13  
NS 16  
DS 2  
SWH 12019.230 Hz  
FIDRES 0.183399 Hz  
AQ 2.7262976 sec  
RG 76.79  
DW 41.600 usec  
DE 6.50 usec  
TE 298.1 K  
D1 1.00000000 sec  
TD0 1

----- CHANNEL f1 -----  
SFO1 600.1537062 MHz  
NUC1 1H  
P1 10.90 usec  
PLW1 22.60000038 W

F2 - Processing parameters  
SI 65536  
SF 600.1500266 MHz  
WDW EM  
SSB 0  
LB 0.30 Hz  
GB 0  
PC 1.00

Dr. Najeeb/AF-K-IV/CDC13  
C13CPD

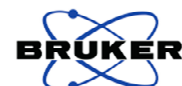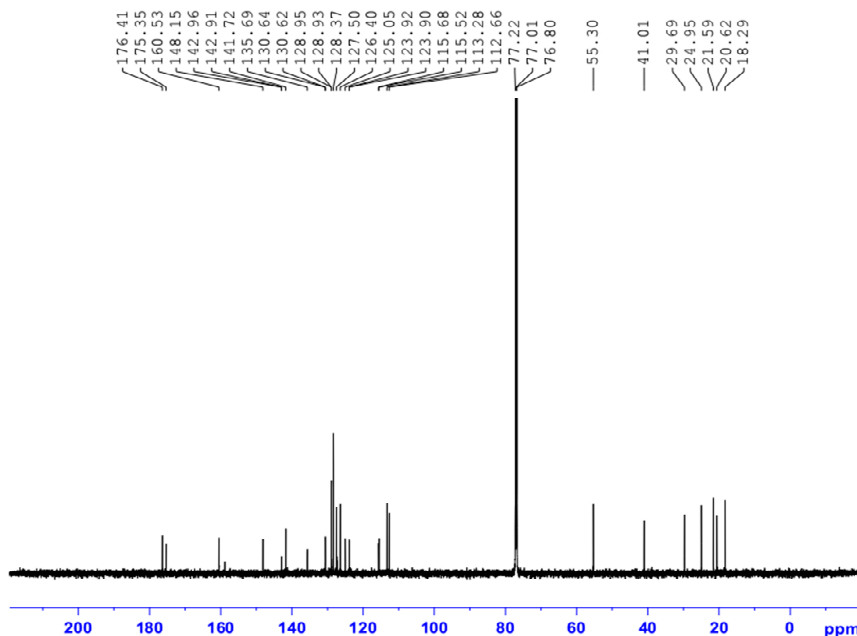

Current Data Parameters  
NAME 29-Mar-2021\_Dr. Najeeb  
EXPNO 62  
PROCNO 1

F2 - Acquisition Parameters  
Date 20210330  
Time 12.52  
INSTRUM spect  
PROBHD 5 mm PABBO BB/  
PULPROG zgpg30  
TD 32768  
SOLVENT CDC13  
NS 2048  
DS 4  
SWH 36057.691 Hz  
FIDRES 1.100393 Hz  
AQ 0.4543829 sec  
RG 195.2  
DW 13.467 usec  
DE 6.50 usec  
TE 298.1 K  
D1 2.00000000 sec  
D11 0.03000000 sec  
TD0 1

----- CHANNEL f1 -----  
SFO1 150.9229276 MHz  
NUC1 13C  
P1 11.60 usec  
PLW1 83.00000000 W

----- CHANNEL f2 -----  
SFO2 600.1524006 MHz  
NUC2 1H  
CPDPRG2 waltz16  
PCPD2 70.00 usec  
PLW2 22.60000038 W  
PLW12 0.52806002 W  
PLW13 0.25874999 W

F2 - Processing parameters  
SI 32768  
SF 150.9078399 MHz  
WDW EM  
SSB 0  
LB 1.00 Hz  
GB 0  
PC 1.40

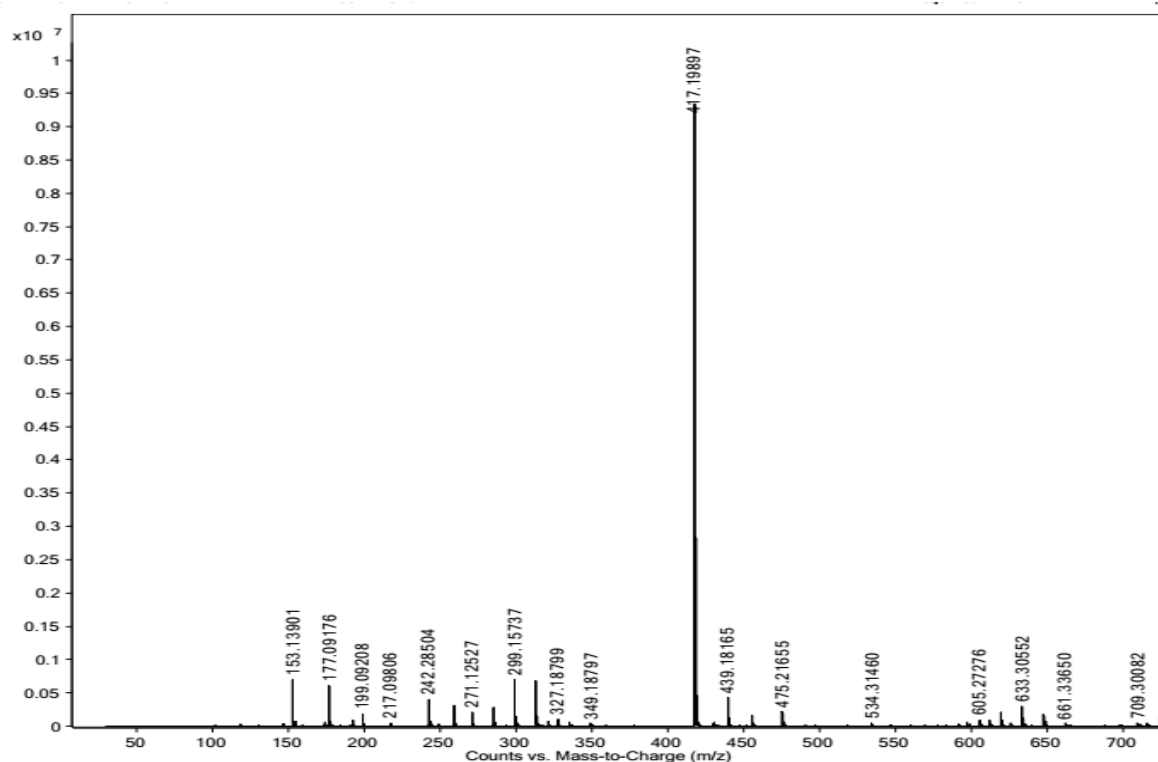

**Figure S19:**  $^1\text{H}$ ,  $^{13}\text{C}$  NMR and HRMS ( $\text{ESI}^+$ ) of compound **5c**

Dr. Najeeb/AF-K-V/CDC13  
PROTON

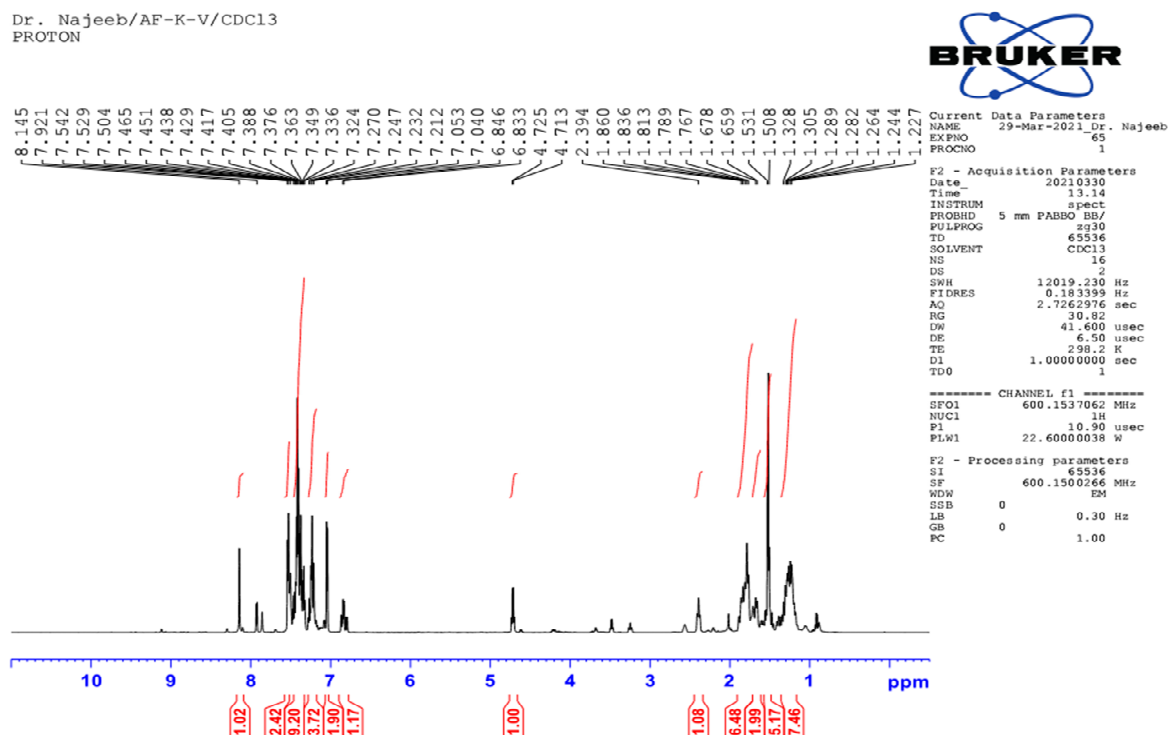

Dr. Najeeb/AF-K-V/CDC13  
C13CPD

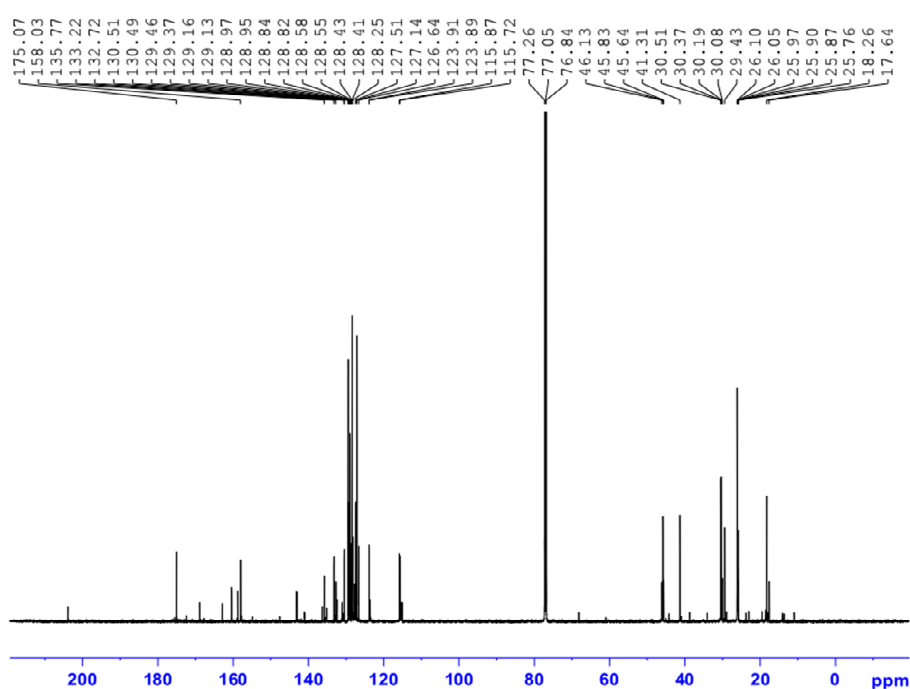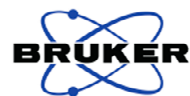

Current Data Parameters  
NAME 29-Mar-2021, Dr. Najeeb  
EXPNO 66  
PROCNO 1

F2 - Acquisition Parameters  
Date\_ 20210330  
Time 14.40  
INSTRUM spect  
PROBHD 5 mm PABBO BB/  
PULPROG zgpg30  
TD 32768  
SOLVENT CDCl3  
NS 2048  
DS 4  
SWH 36057.691 Hz  
FIDRES 1.100393 Hz  
AQ 0.4543829 sec  
RG 195.2  
RM 15.867 usec  
DE 6.50 usec  
TE 298.2 K  
D1 2.00000000 sec  
D11 0.03000000 sec  
TDO 1

----- CHANNEL f1 -----  
SFO1 150.9229278 MHz  
NUC1 13C  
P1 11.60 usec  
PLW1 83.00000000 W  
----- CHANNEL f2 -----  
SFO2 600.1524006 MHz  
NUC2 1H  
CPDPRG2 waltz16  
PCPD2 70.00 usec  
PLW2 22.60000000 W  
PLW12 0.52806002 W  
PLW13 0.25874999 W

F2 - Processing parameters  
SI 32768  
SF 150.9078399 MHz  
WDW EM  
SSB 0  
LB 1.00 Hz  
GB 0  
PC 1.40

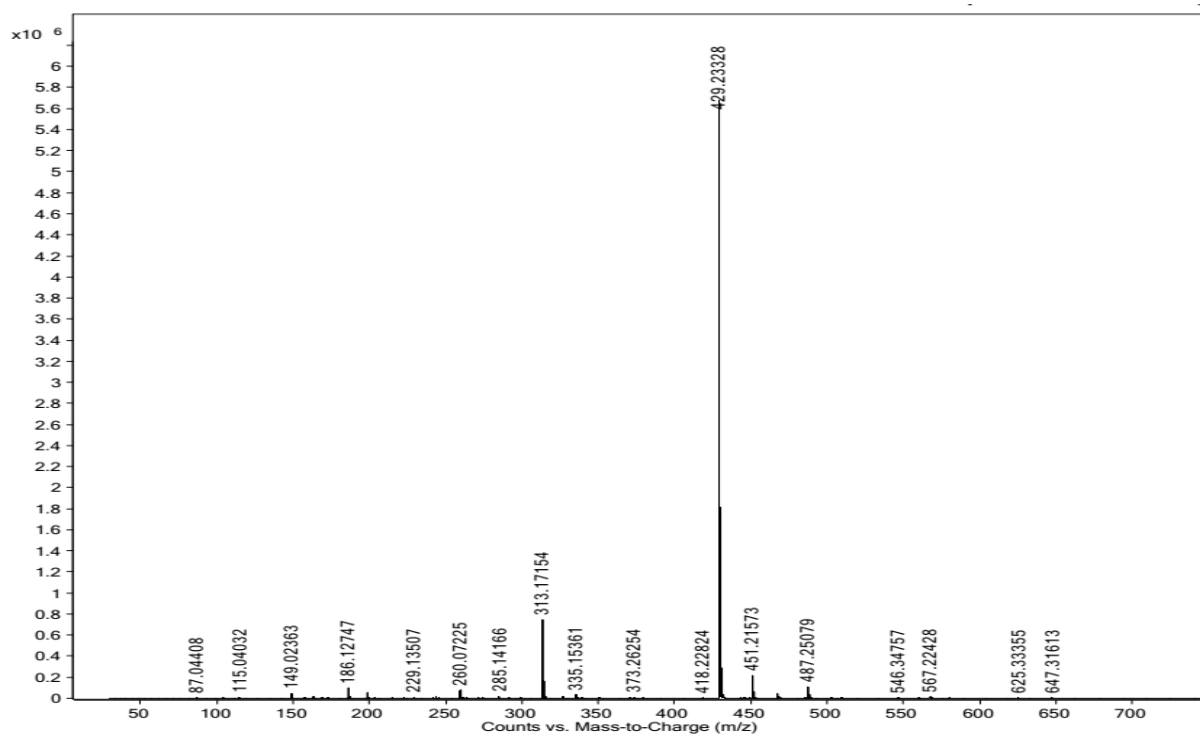

**Figure S20:**  $^1\text{H}$ ,  $^{13}\text{C}$  NMR and HRMS ( $\text{ESI}^+$ ) of compound **5d**

Dr. Najeeb/AF-K-VI/CDC13  
PROTON

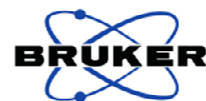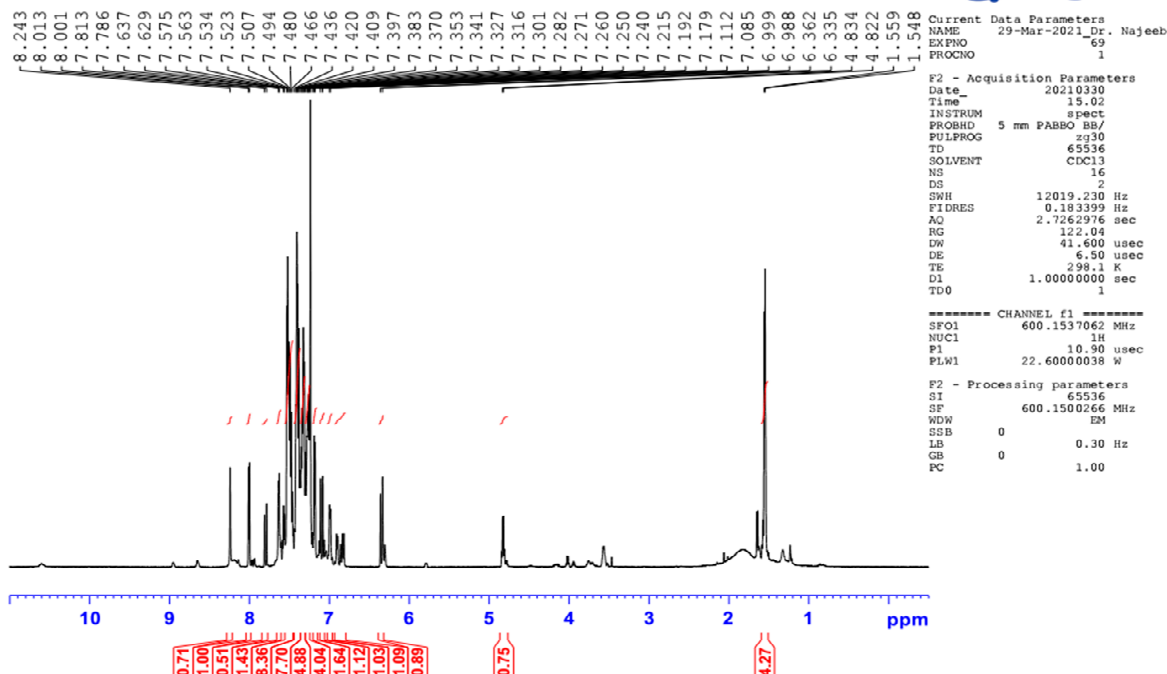

Dr. Najeeb/AF-K-VI/CDC13  
C13CPD

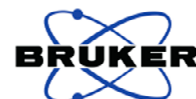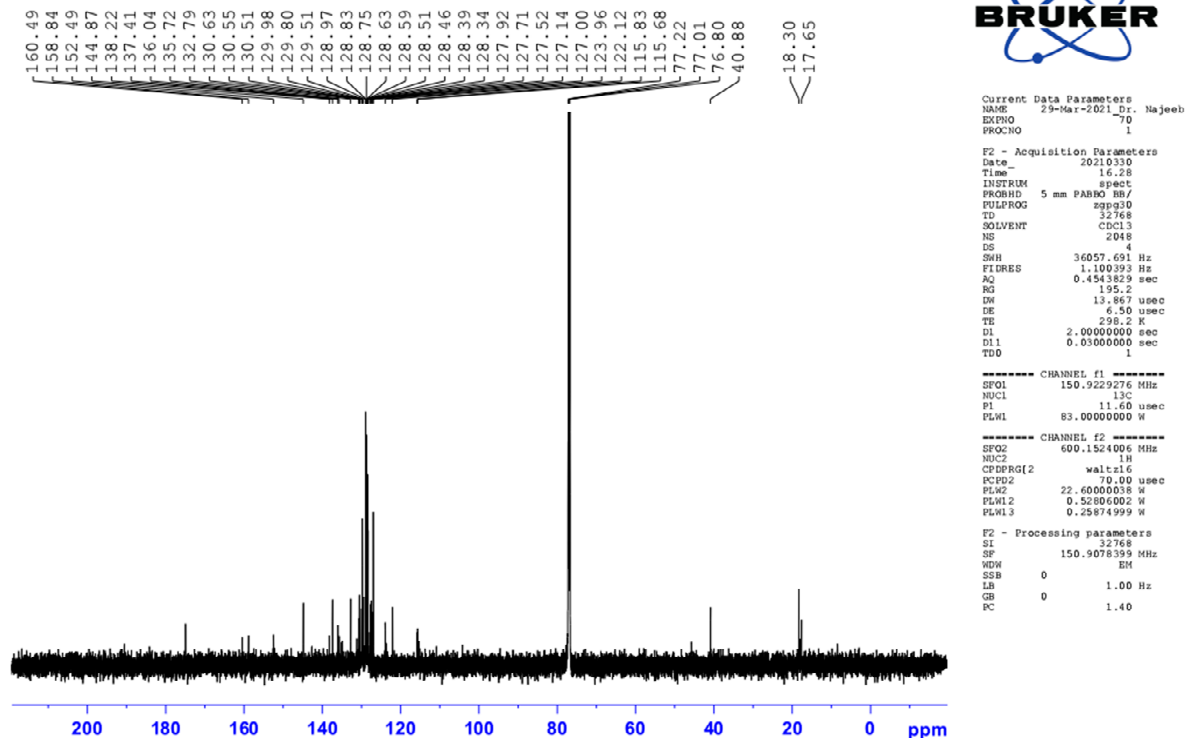

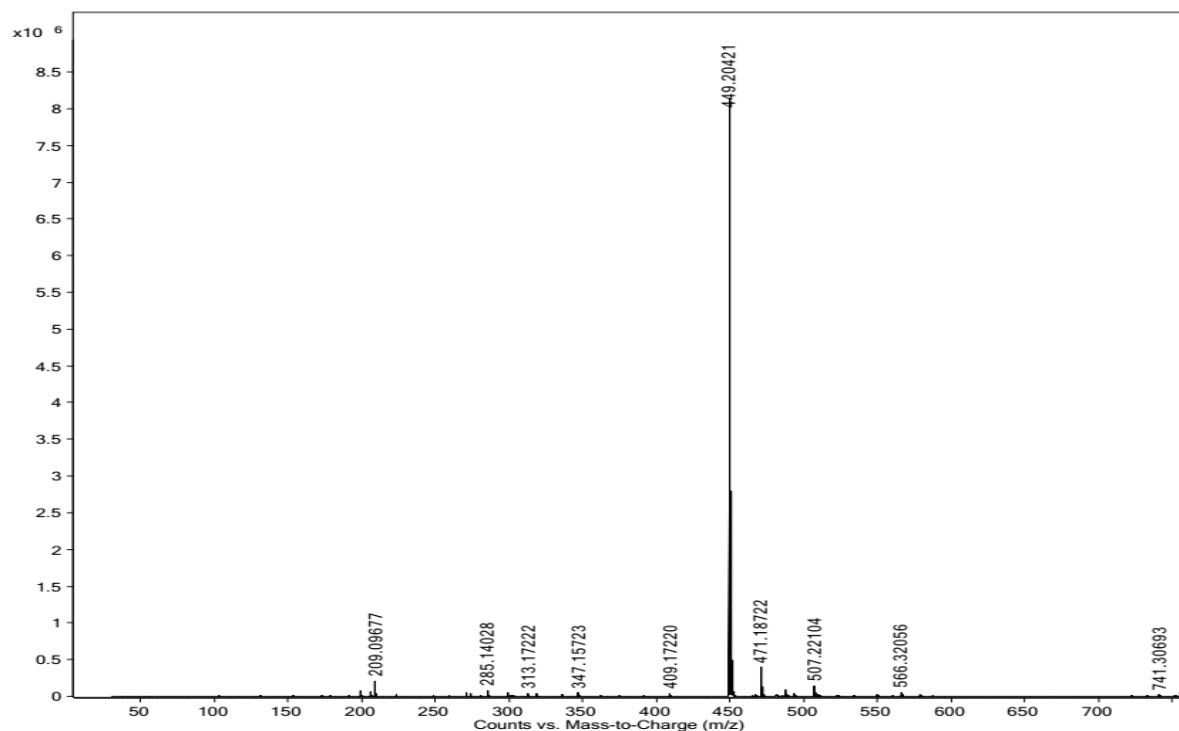

**Figure S21:**  $^1\text{H}$ ,  $^{13}\text{C}$  NMR and HRMS (ESI<sup>+</sup>) of compound **5e**

Dr. Najeeb/AF-K-VII/CDC13  
PROTON

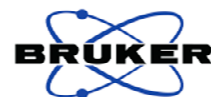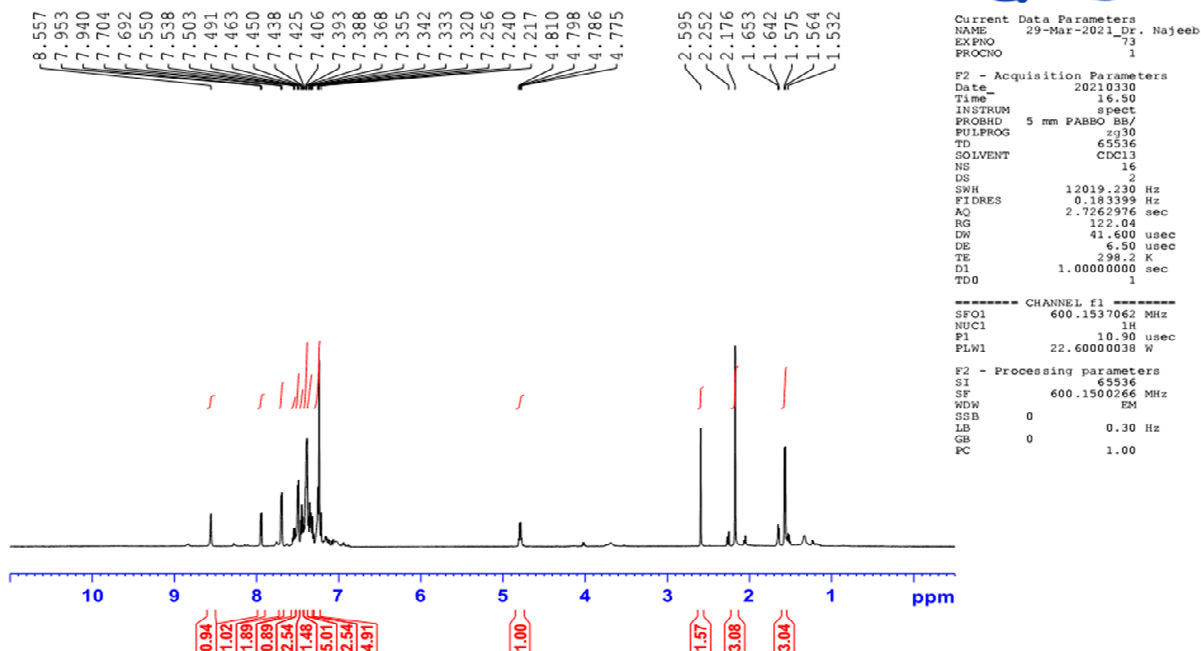

Dr. Najeeb/AF-K-VII/CDC13  
C13CPD

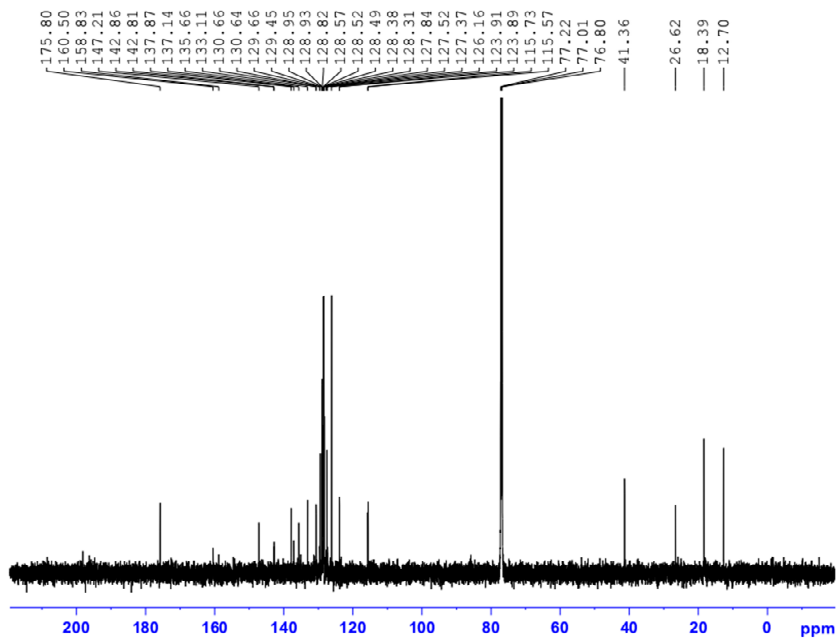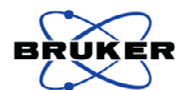

Current Data Parameters  
NAME 29-Mar-2021 Dr. Najeeb  
EXPNO 74  
PROCNO 1

F2 - Acquisition Parameters  
Date\_ 20210330  
Time 18.16  
INSTRUM spect  
PROBHD 5 mm PABBO BB/  
PULPROG zgpg30  
TD 32768  
SOLVENT CDCl3  
NS 2048  
DS 4  
SWH 36057.691 Hz  
FIDRES 1.100393 Hz  
AQ 0.4543829 sec  
RG 195.2  
DM 13.867 usec  
DE 6.50 usec  
TE 298.2 K  
D1 2.0000000 sec  
D11 0.0500000 sec  
TDO 1

----- CHANNEL f1 -----  
SFO1 150.9229276 MHz  
NUC1 13C  
P1 11.60 usec  
PLM1 83.0000000 W

----- CHANNEL f2 -----  
SFO2 600.1524006 MHz  
NUC2 1H  
CPDPRG2 waltz16  
PCPD2 70.00 usec  
PLM2 22.6000000 W  
PLM3 0.52806002 W  
PLM3 0.25874959 W

F2 - Processing parameters  
ET 32768  
SF 150.9078359 MHz  
WDW EM  
SSB 0  
LB 1.00 Hz  
GB 0  
PC 1.40

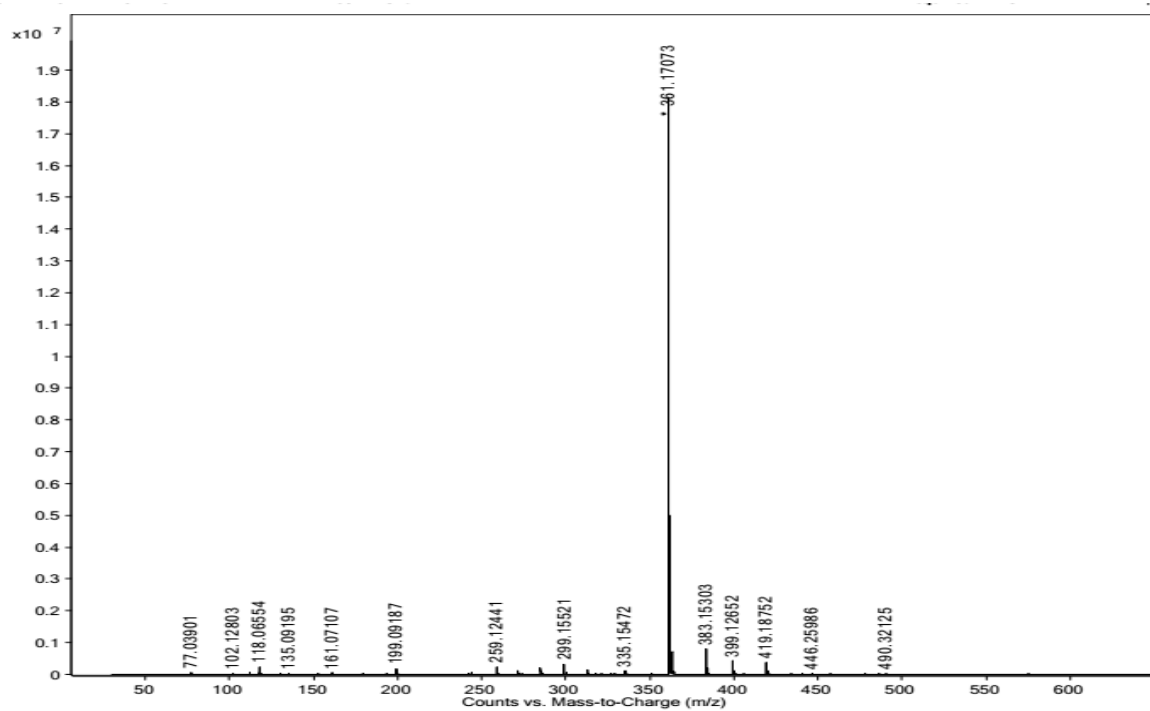

**Figure S22:**  $^1\text{H}$ ,  $^{13}\text{C}$  NMR and HRMS ( $\text{ESI}^+$ ) of compound **5f**



Dr. Najeeb/AF-K-VIII/CDC13  
PROTON

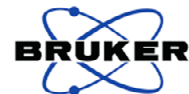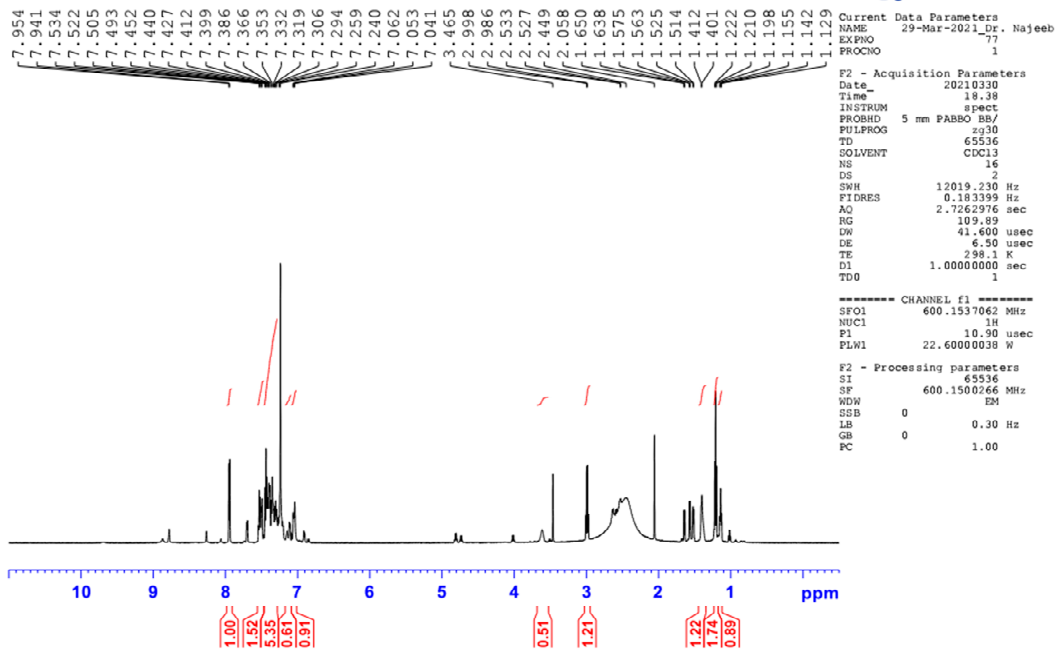

Dr. Najeeb/AF-K-VIII/CDC13  
C13CPD

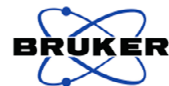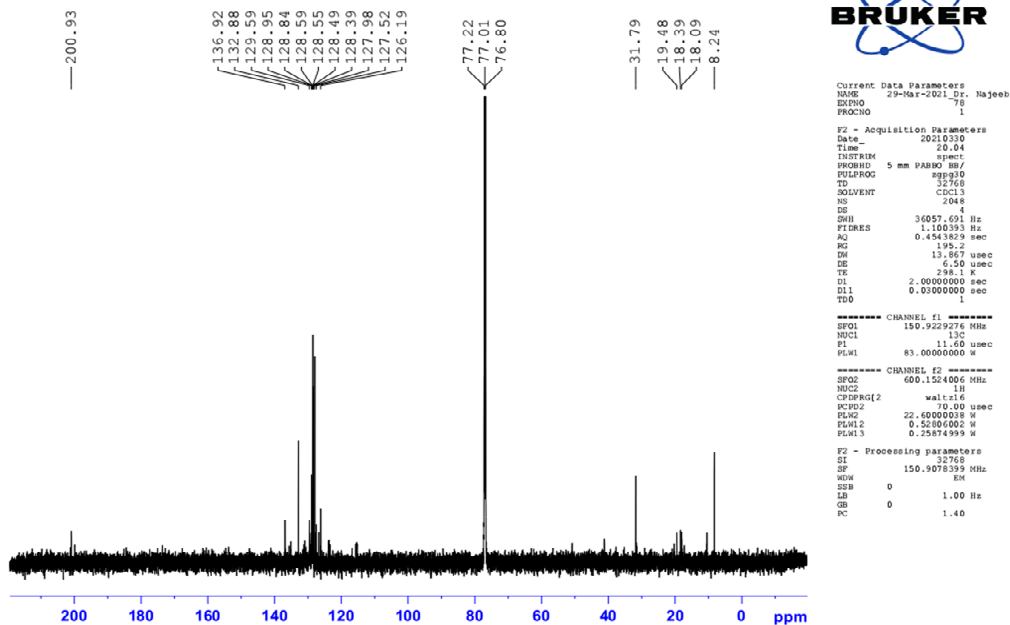

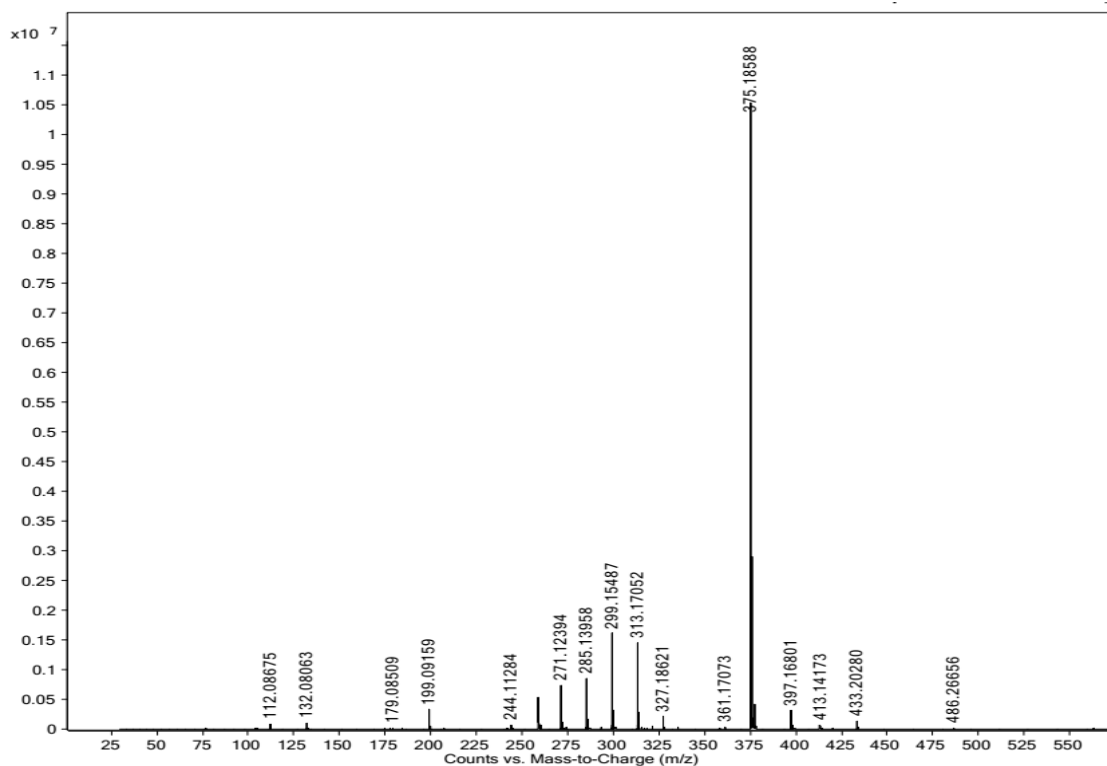

**Figure S23:**  $^1\text{H}$ ,  $^{13}\text{C}$  NMR and HRMS ( $\text{ESI}^+$ ) of compound **5g**

Dr. Najeeb / AF-K-IX / MeOD  
PROTON

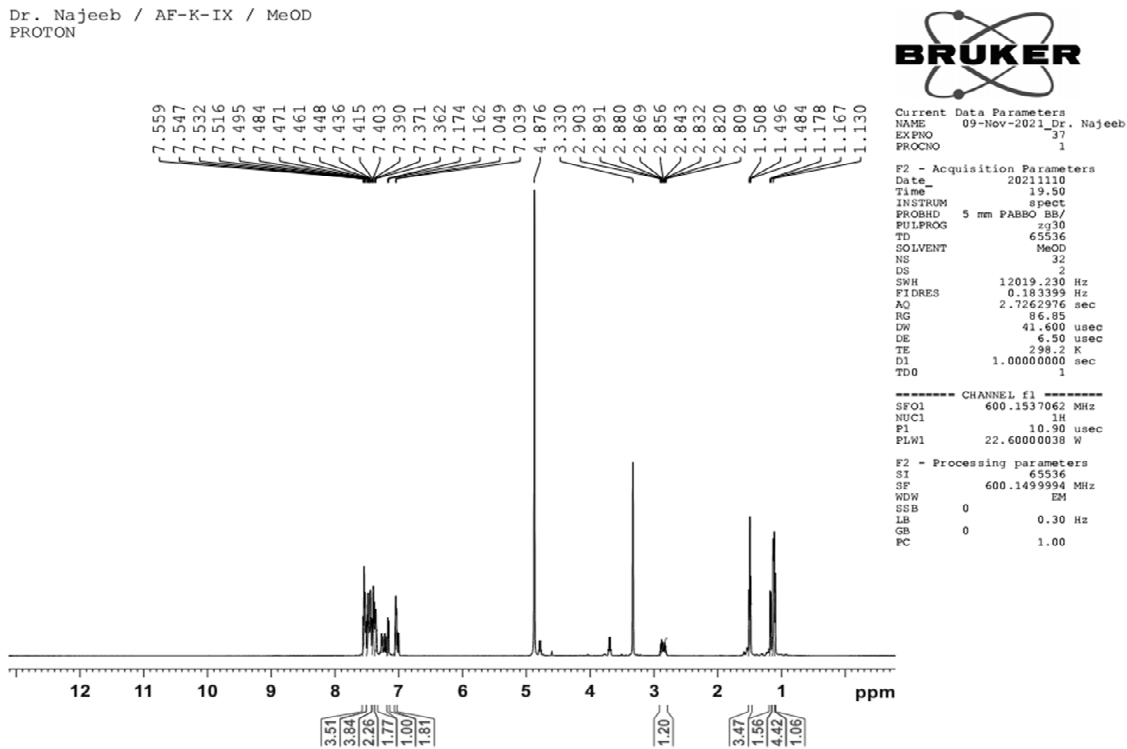

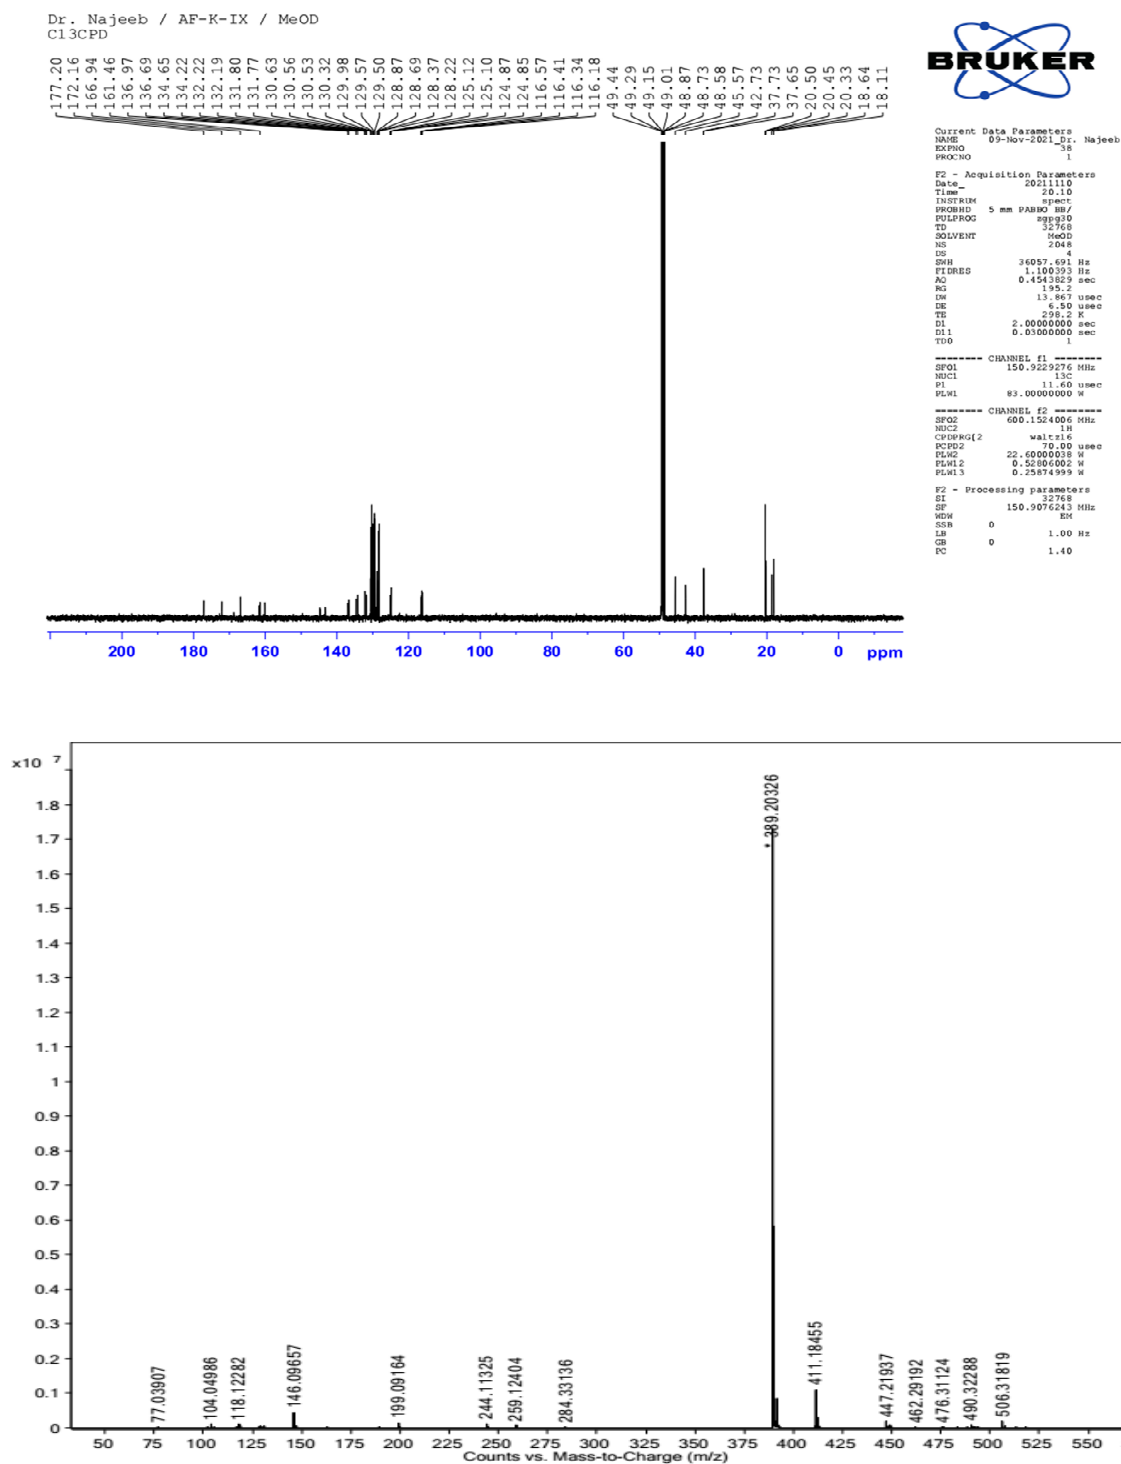

Figure S24:  $^1\text{H}$ ,  $^{13}\text{C}$  NMR and HRMS ( $\text{ESI}^+$ ) of compound **5h**

Dr. Najeeb / AF-K-X / MeOD  
PROTON

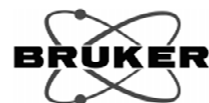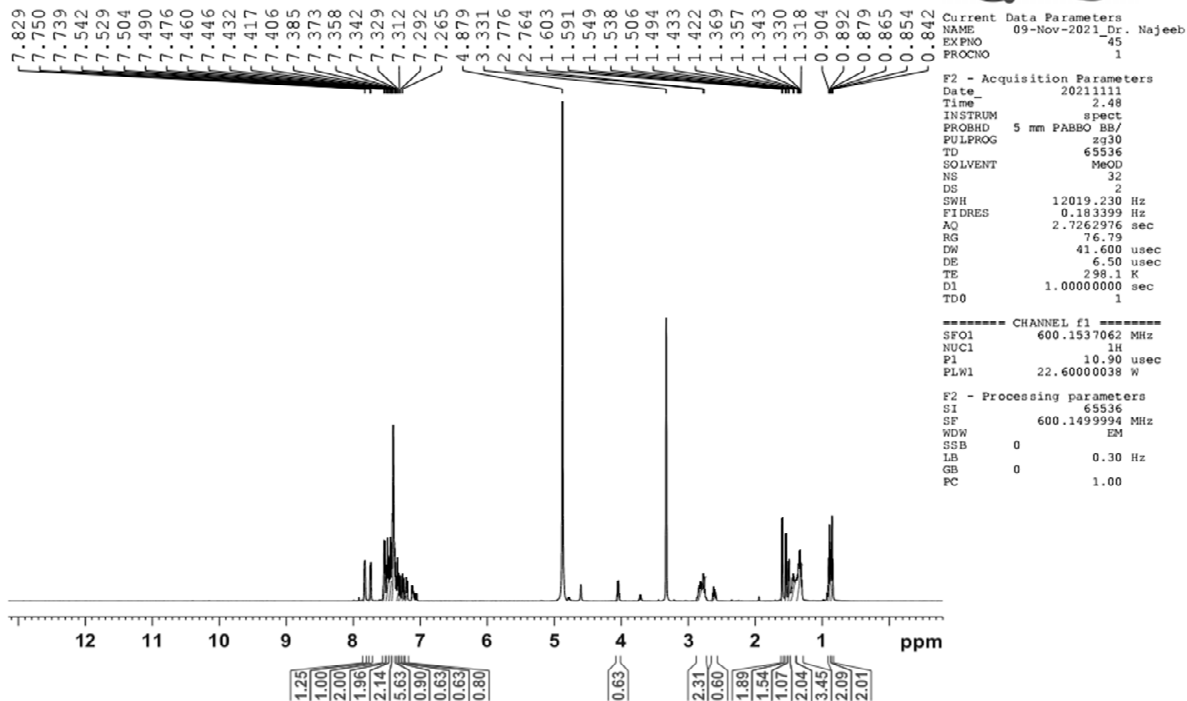

Dr. Najeeb / AF-K-X / MeOD  
C13CPD

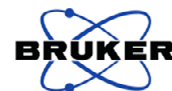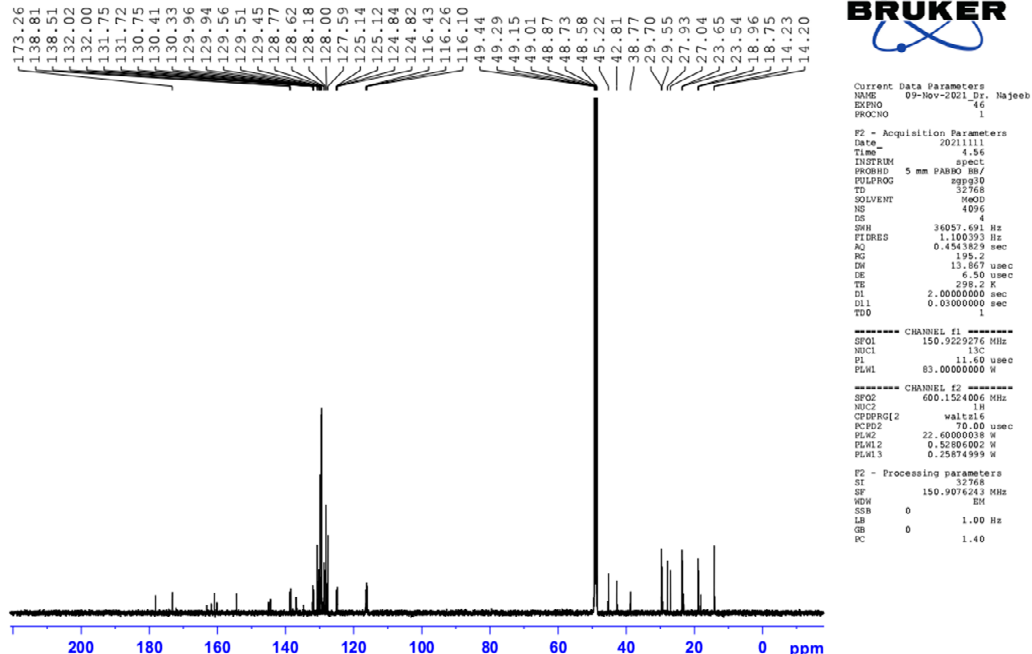

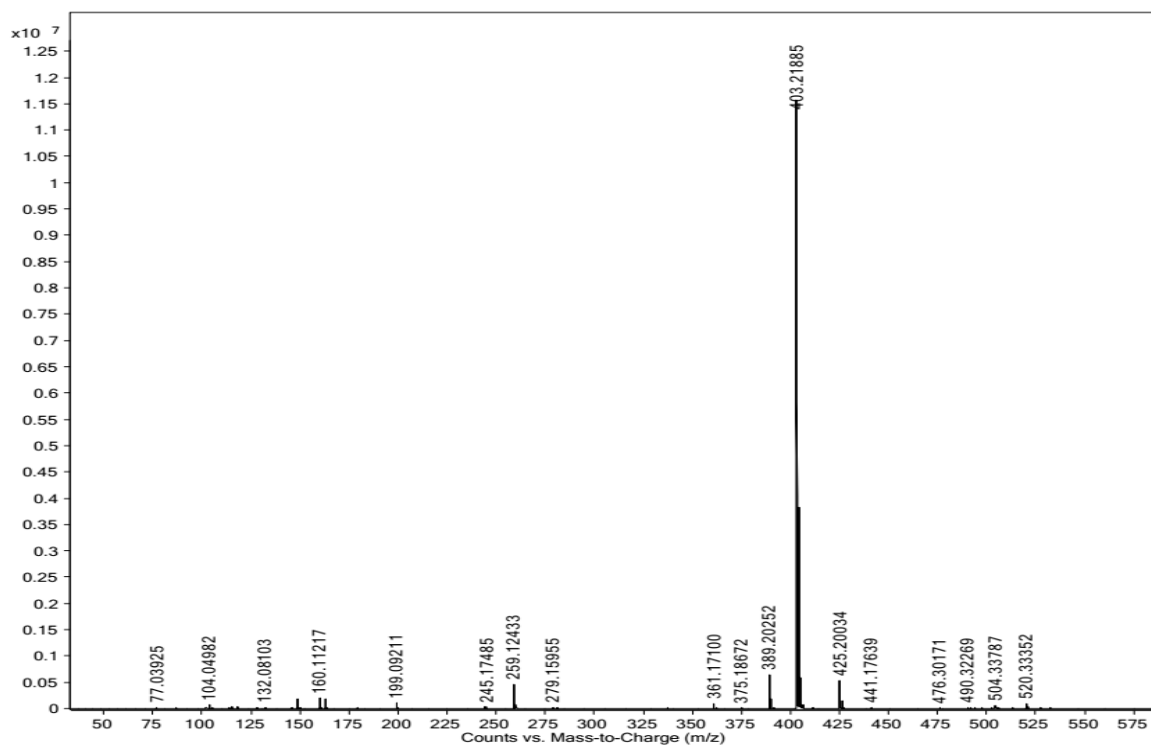

**Figure S25:** <sup>1</sup>H, <sup>13</sup>C NMR and HRMS (ESI<sup>+</sup>) of compound **5i**

Dr. Najeeb / AF-K-XI / MeOD  
PROTON

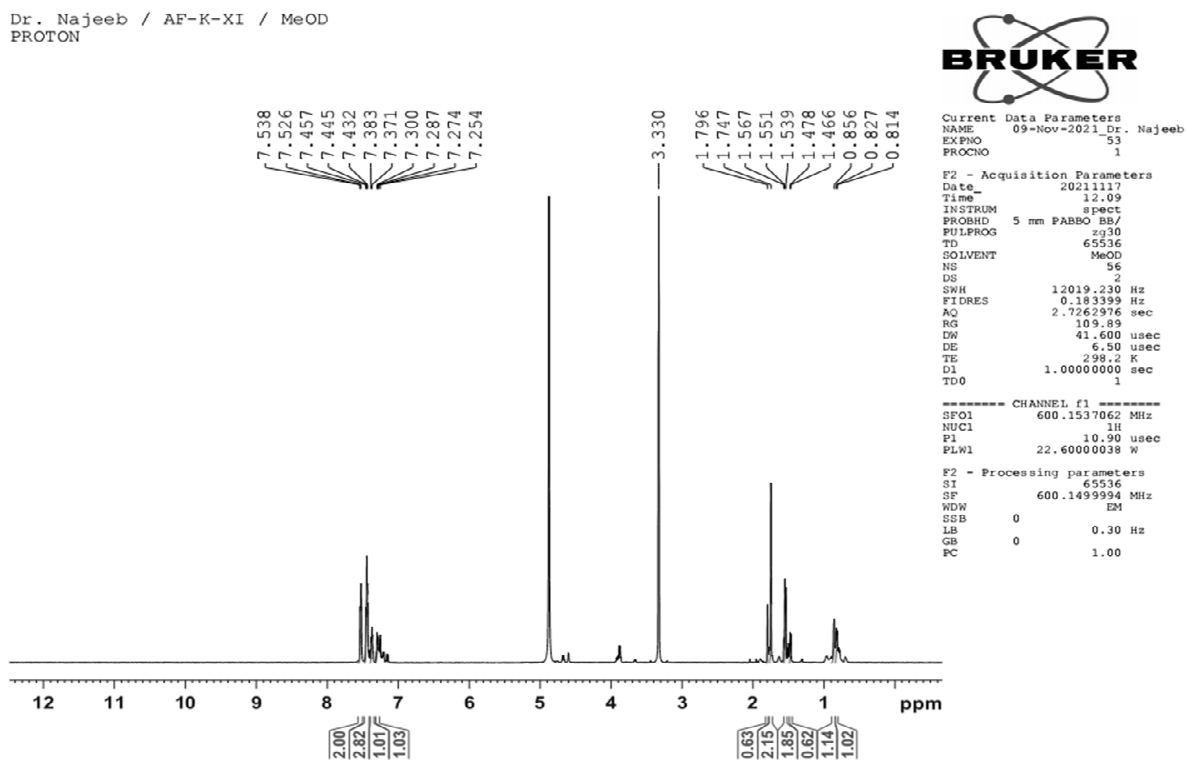

Dr. Najeeb / AF-K-XI / MeOD  
C13CPD

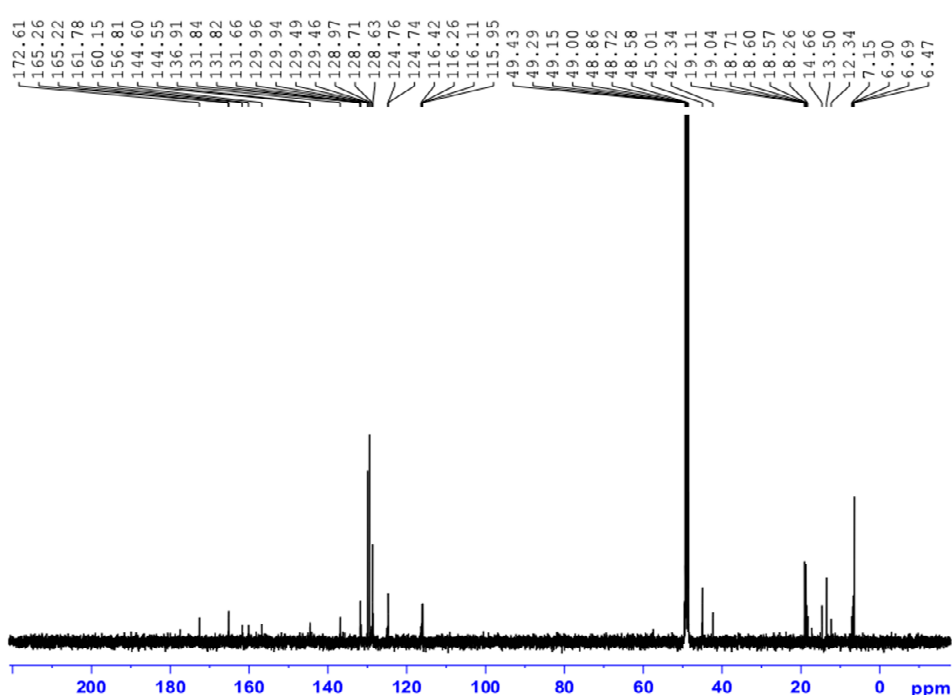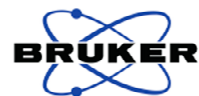

Current Data Parameters  
NAME 09-Nov-2021 Dr. Najeeb  
EXPNO 34  
PROCNO 1

F2 - Acquisition Parameters  
Date\_ 20211117  
Time 12.11  
INSTRUM spect  
PROBHD 5 mm PABBO BB/  
PULPROG zgpg30  
TD 32768  
SOLVENT MeOD  
NS 5603  
DS 4  
SWH 36057.691 Hz  
FIDRES 1.100393 Hz  
AQ 0.4543829 sec  
RG 195.2  
RW 13.867 usec  
BE 6.50 usec  
TE 298.4 K  
DL 2.00000000 sec  
D11 0.03000000 sec  
TDO 1

----- CHANNEL f1 -----  
SF01 150.9229276 MHz  
NUC1 13C  
PL1 11.60 usec  
PLW1 83.00000000 W

----- CHANNEL f2 -----  
SF02 600.1324006 MHz  
NUC2 1H  
CPDPRG2 Waltz16  
PCPD2 70.00 usec  
PLW2 22.60000038 W  
PLW12 0.52806002 W  
PLW13 0.25874999 W

F2 - Processing parameters  
SI 32768  
SF 150.9076243 MHz  
WDW EM  
SSB 0  
LB 1.00 Hz  
GB 0  
PC 1.40

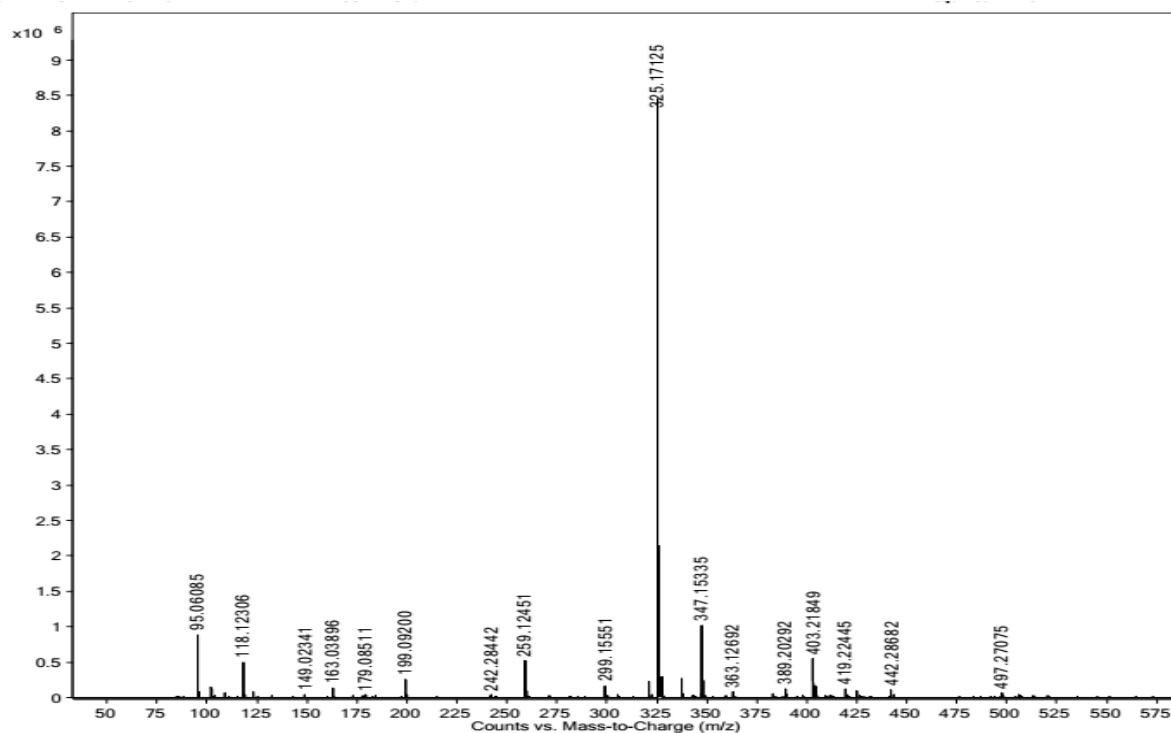

Figure S26:  $^1\text{H}$ ,  $^{13}\text{C}$  NMR and HRMS ( $\text{ESI}^+$ ) of compound **5j**

Dr. Najeeb / AF-K-XII / MeOD  
PROTON

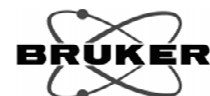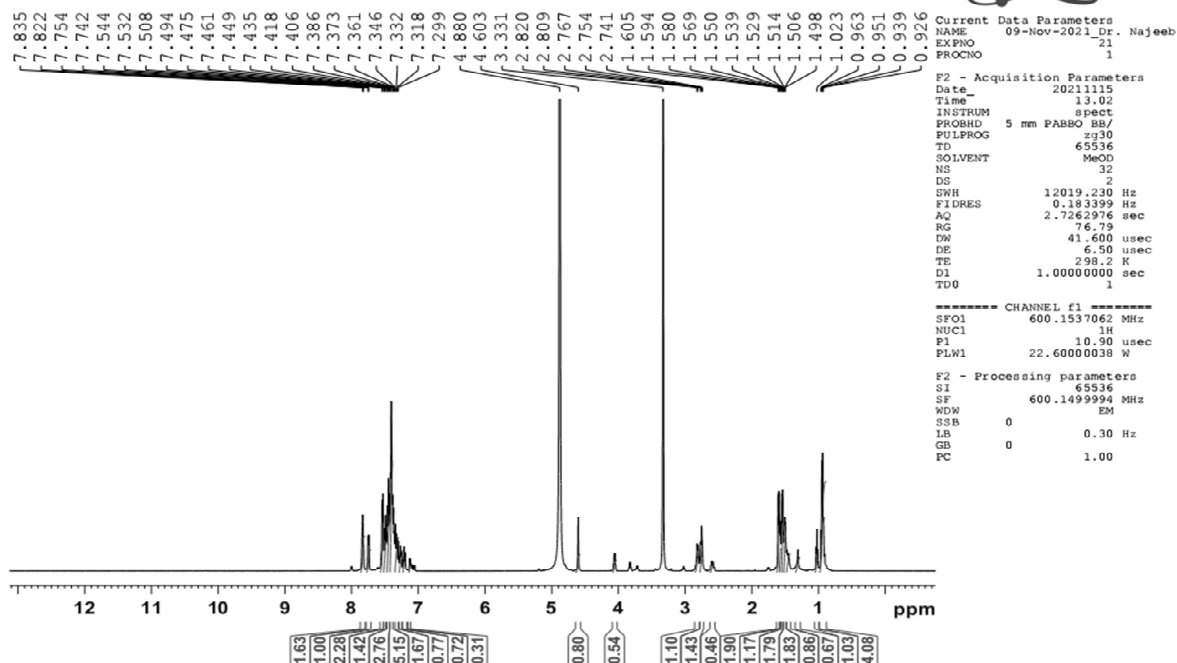

Dr. Najeeb / AF-K-XII / MeOD  
C13CPD

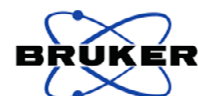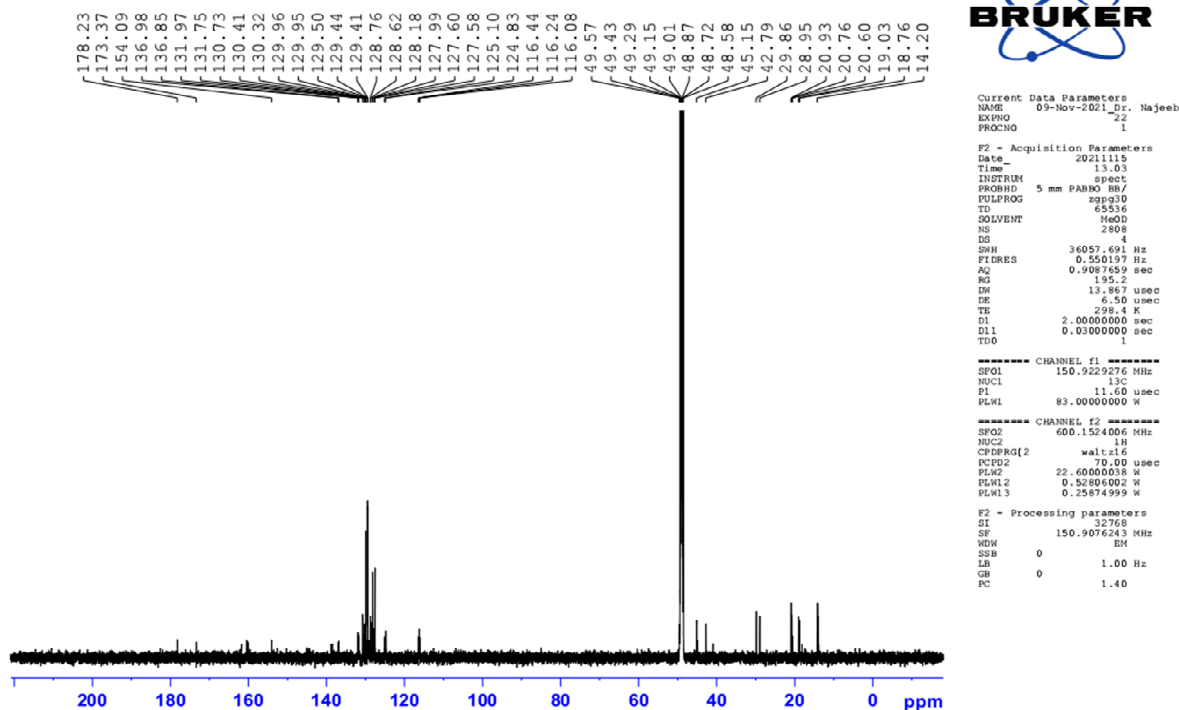

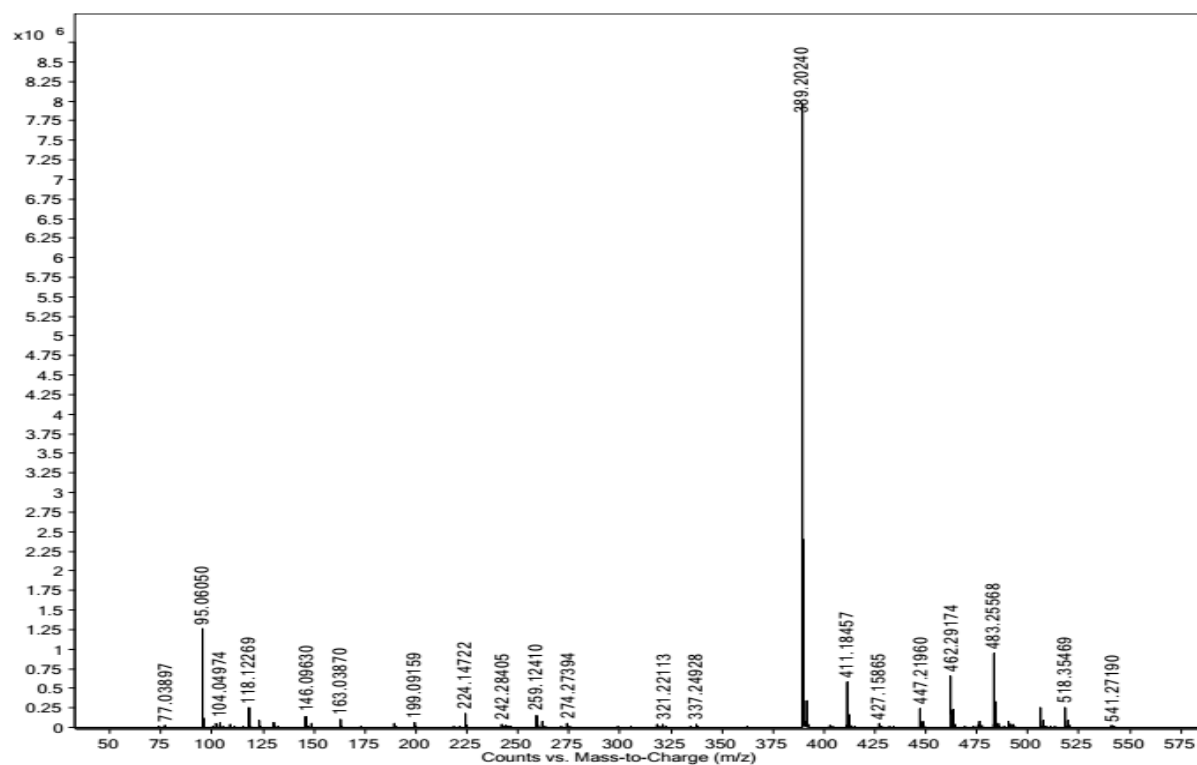

**Figure S27:**  $^1\text{H}$ ,  $^{13}\text{C}$  NMR and HRMS ( $\text{ESI}^+$ ) of compound **5k**

Dr. Najeeb / AF-K-XIII / MeOD  
PROTON

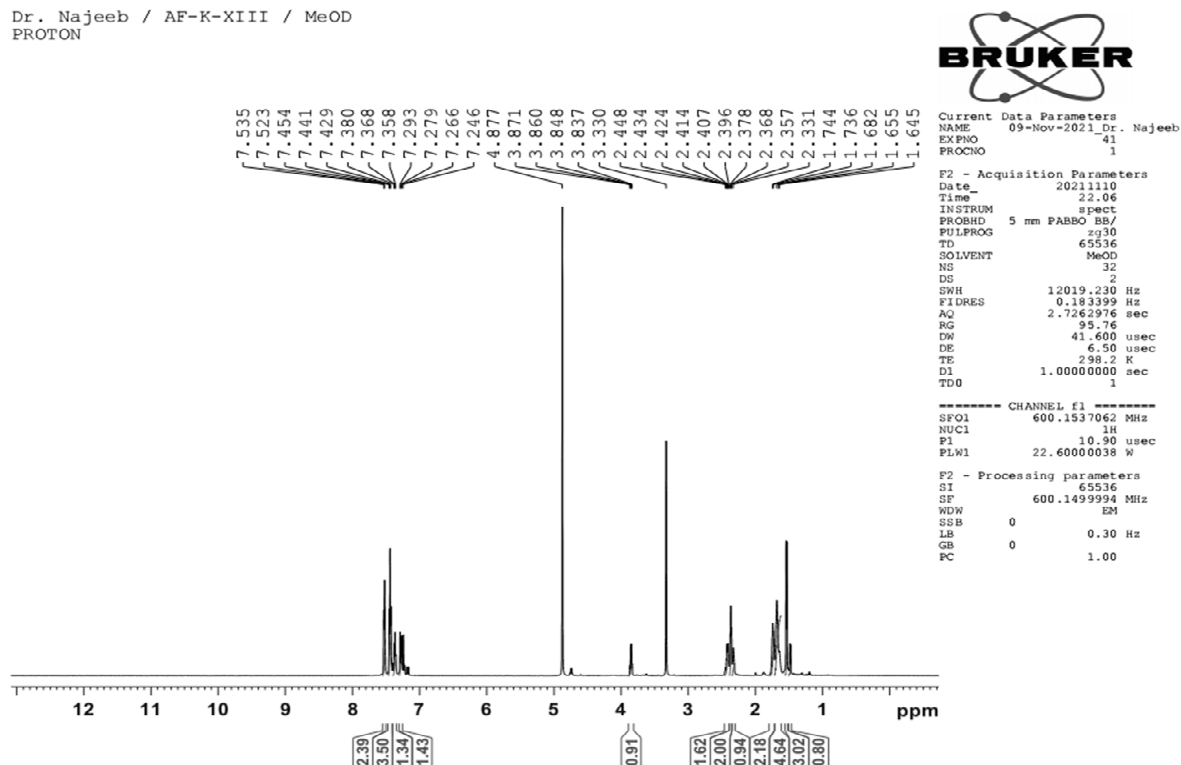



Dr. Najeeb / AF-K-XIII / MeOD  
C13CPD

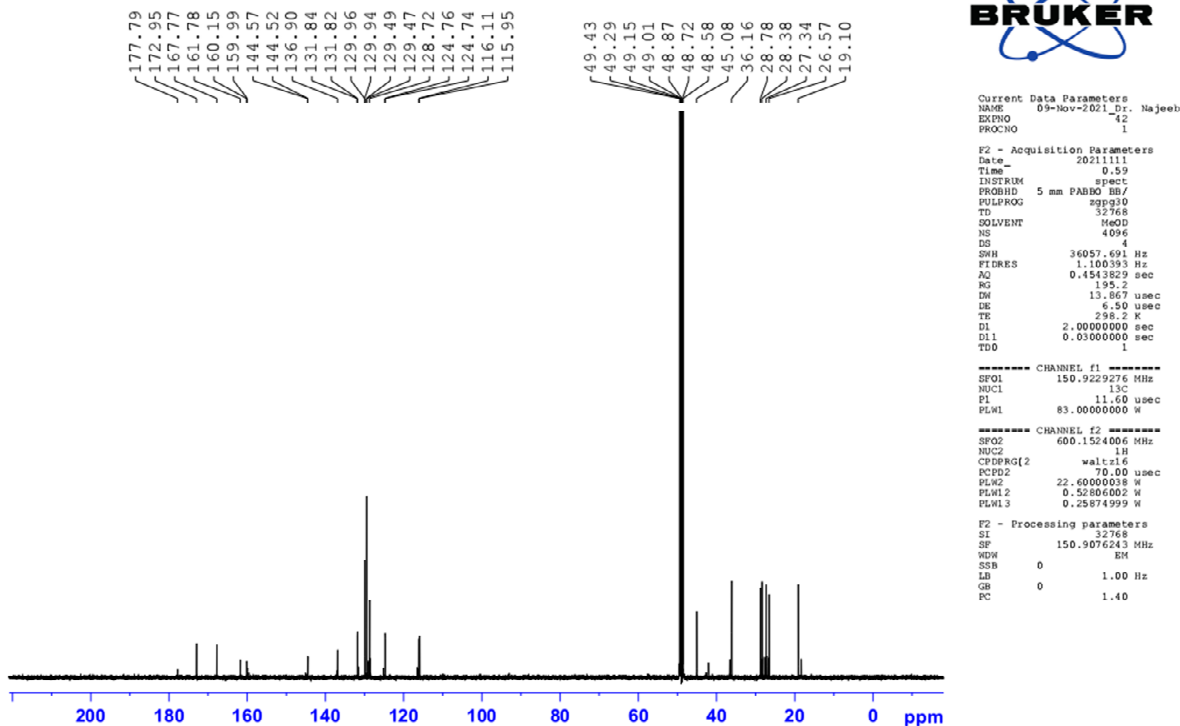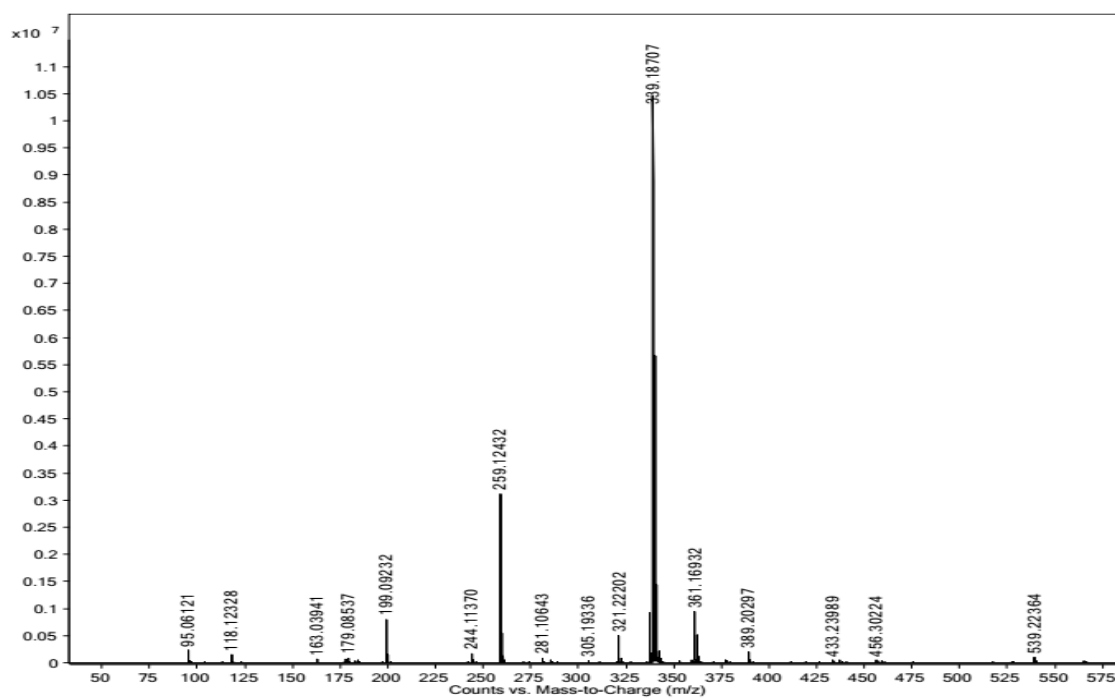

**Figure S28:**  $^1\text{H}$ ,  $^{13}\text{C}$  NMR and HRMS ( $\text{ESI}^+$ ) of compound **5I**

Dr. Najeeb / AF-K-XIV / MeOD  
PROTON

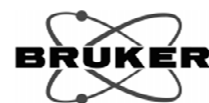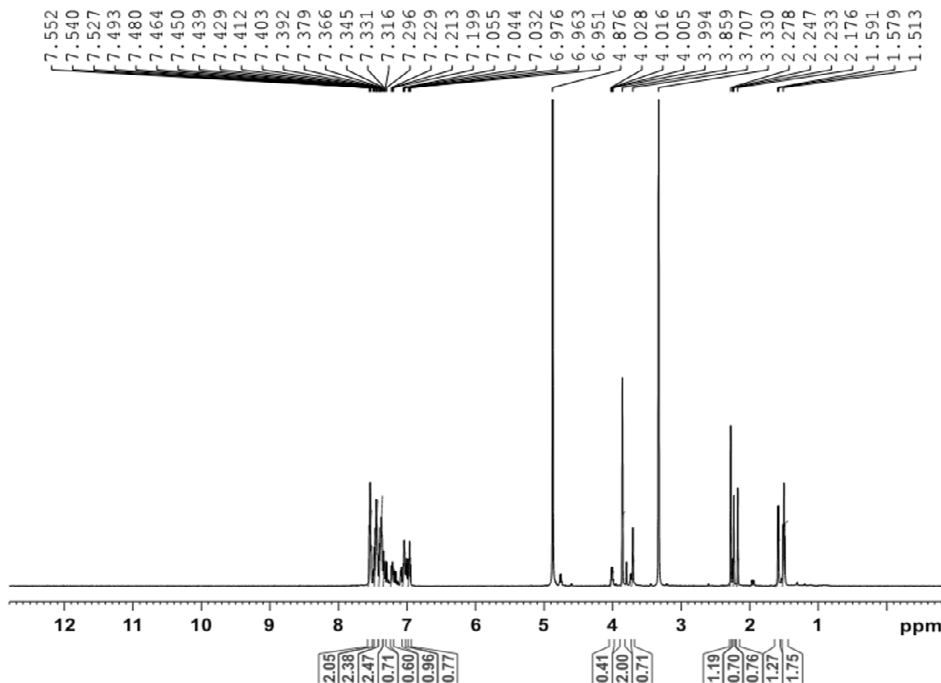

Current Data Parameters  
NAME 09-Nov-2021 Dr. Najeeb  
EXPNO 49  
PROCNO 1

F2 - Acquisition Parameters  
Date\_ 20211111  
Time 6.34  
INSTRUM spect  
PROBHD 5 mm PABBO BB/  
PULPROG zg30  
TD 65536  
SOLVENT MeOD  
NS 32  
DS 2  
SWH 12019.230 Hz  
FIDRES 0.183399 Hz  
AQ 2.7262976 sec  
RG 109.89  
DW 41.600 usec  
DE 6.50 usec  
TE 298.2 K  
D1 1.00000000 sec  
TD0 1

----- CHANNEL f1 -----  
SFO1 600.1537062 MHz  
NUC1 1H  
P1 10.90 usec  
PLW1 22.60000038 W

F2 - Processing parameters  
SI 65536  
SF 600.1499994 MHz  
WDW EM  
SSB 0  
LB 0.30 Hz  
GB 0  
PC 1.00

Dr. Najeeb / AF-K-XIV / MeOD  
C13CPD

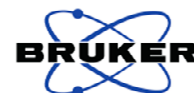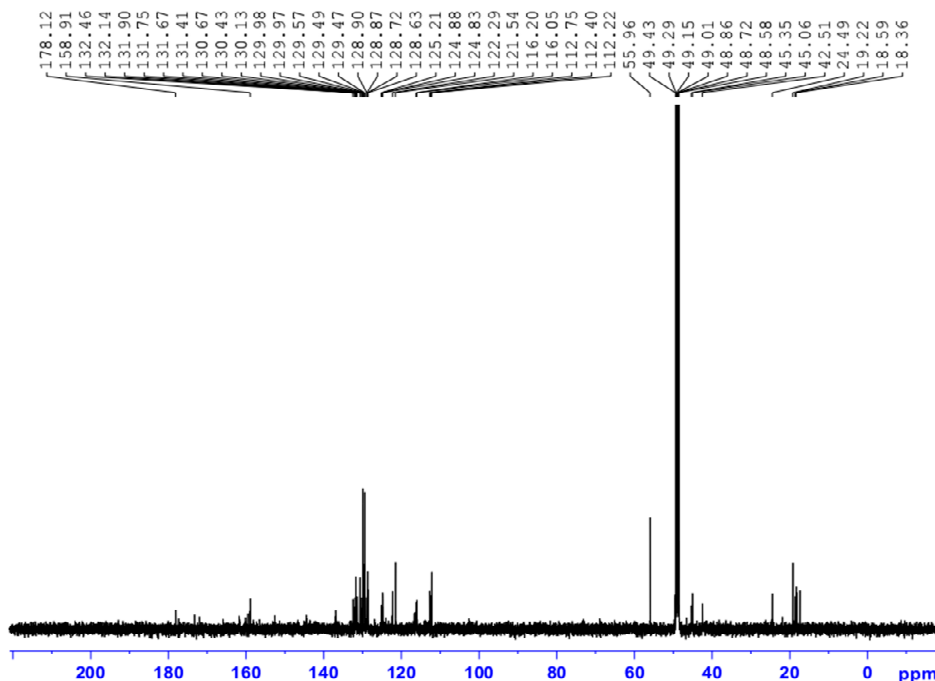

Current Data Parameters  
NAME 09-Nov-2021 Dr. Najeeb  
EXPNO 50  
PROCNO 1

F2 - Acquisition Parameters  
Date\_ 20211111  
Time 7.12  
INSTRUM spect  
PROBHD 5 mm PABBO BB/  
PULPROG zgpg30  
TD 32768  
SOLVENT MeOD  
NS 4096  
DS 4  
SWH 36057.691 Hz  
FIDRES 1.100393 Hz  
AQ 0.4543829 sec  
RG 198.2  
DW 15.867 usec  
DE 6.50 usec  
TE 298.1 K  
D1 2.00000000 sec  
D11 0.03000000 sec  
TD0 1

----- CHANNEL f1 -----  
SFO1 150.9229274 MHz  
NUC1 13C  
P1 1.60 usec  
PLW1 83.00000000 W

----- CHANNEL f2 -----  
SFO2 600.1524006 MHz  
NUC2 1H  
CPDPRG2 waltz16  
PCPD2 70.00 usec  
PLW2 22.60000038 W  
PLW12 0.52806002 W  
PLW13 0.25874999 W

F2 - Processing parameters  
SI 32768  
SF 150.9076243 MHz  
WDW EM  
SSB 0  
LB 1.00 Hz  
GB 0  
PC 1.40

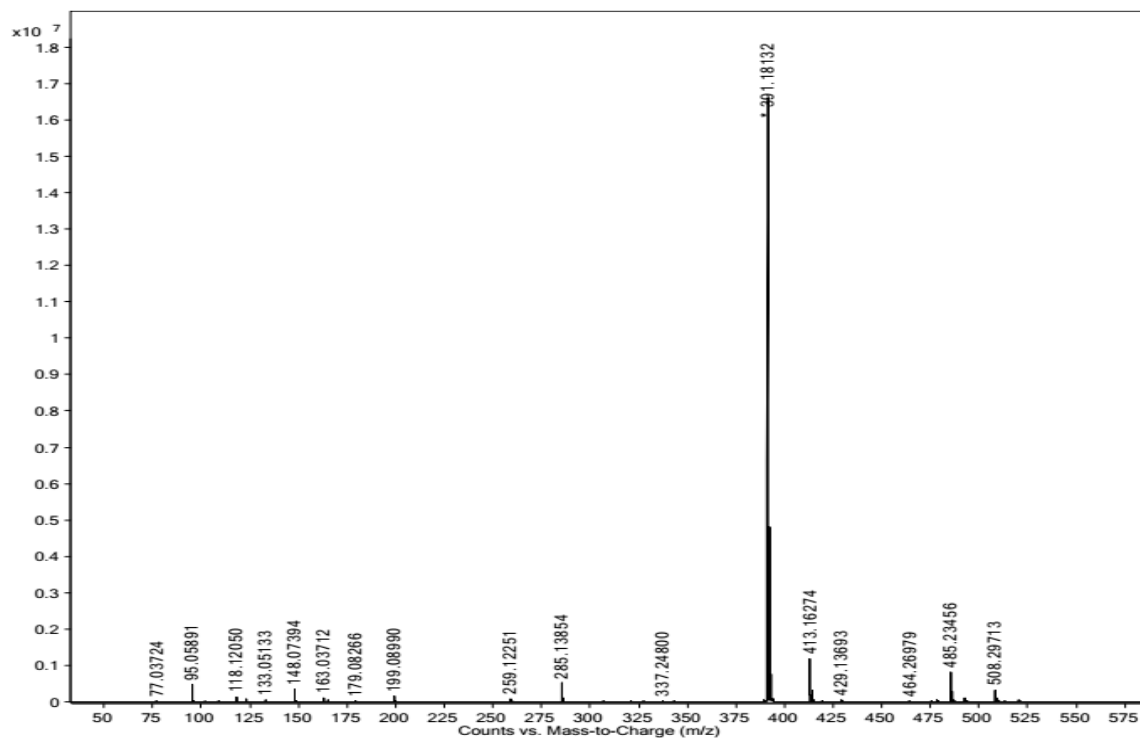

**Figure S29:**  $^1\text{H}$ ,  $^{13}\text{C}$  NMR and HRMS ( $\text{ESI}^+$ ) of compound **5m**

Dr. Najeeb / AF-K-XV (1) / CDC13  
PROTON

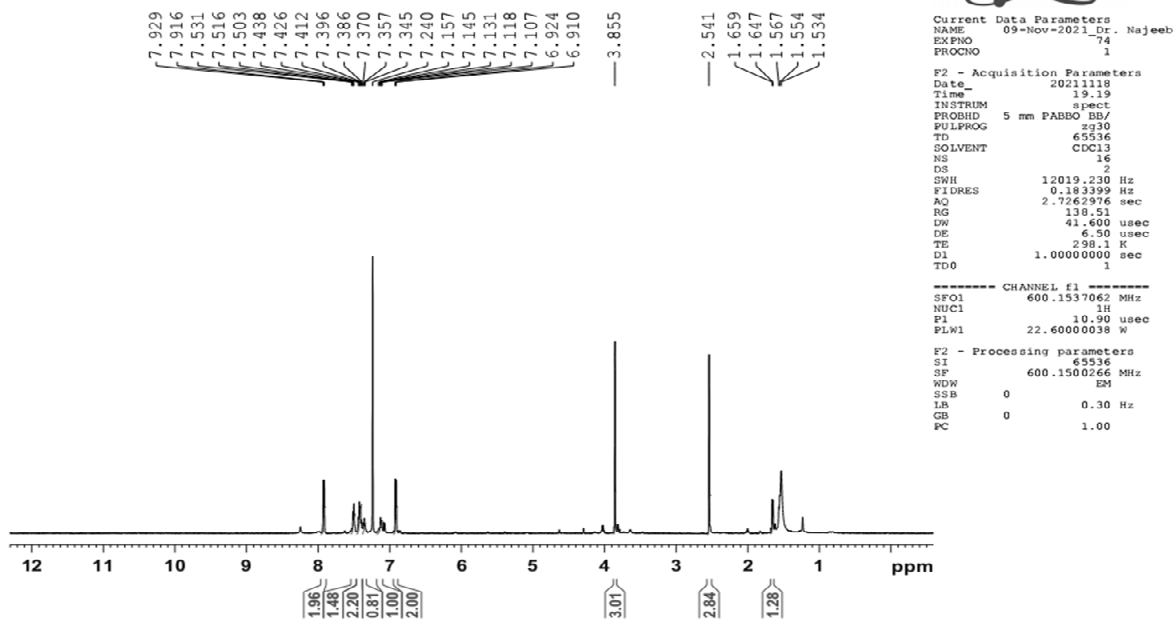

Dr. Najeeb / AF-K-XV (1) / CDCl<sub>3</sub>  
 Cl<sub>3</sub>CPD

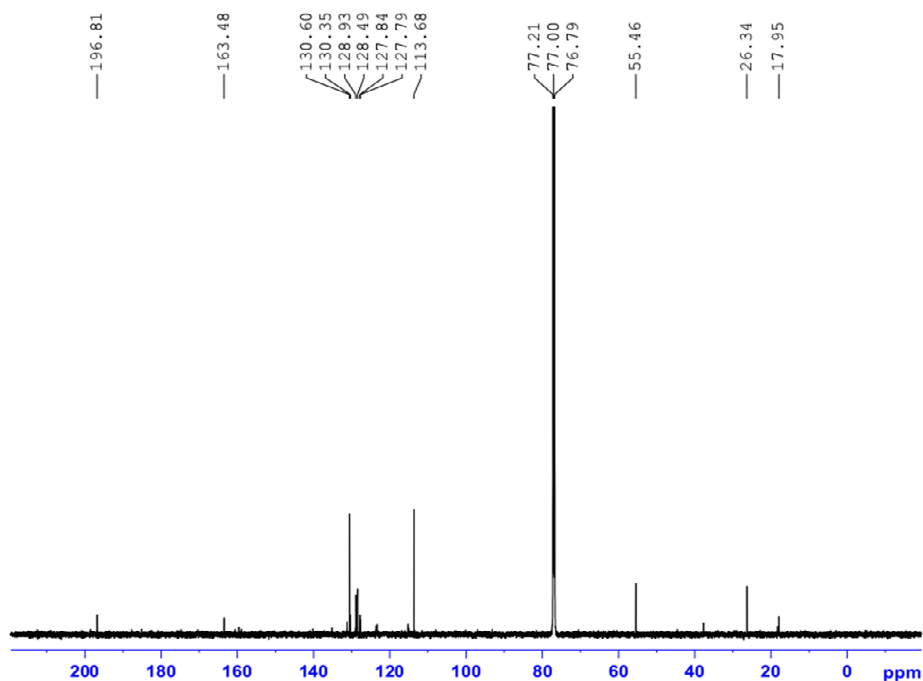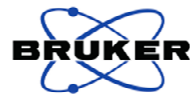

Current Data Parameters  
 NAME 09-Nov-2021\_Dr. Najeeb  
 EXPRNO 75  
 PROCNO 1

F2 - Acquisition Parameters  
 Date\_ 20211118  
 Time 19.42  
 INSTRUM spect  
 PROBHD 5 mm PABBO BB/  
 PULPROG zgpg30  
 TD 65536  
 SOLVENT CDCl<sub>3</sub>  
 NS 14164  
 DS 4  
 SWH 36057.691 Hz  
 FIDRES 0.550197 Hz  
 AQ 0.9087659 sec  
 RG 195.2  
 DM 13.867 usec  
 DE 6.50 usec  
 TR 298.1 K  
 DL 2.00000000 sec  
 D11 0.03000000 sec  
 TDD 1

----- CHANNEL f1 -----  
 SFOL 150.9229276 MHz  
 NUC1 13C  
 PL 11.60 usec  
 PLW1 83.00000000 W

----- CHANNEL f2 -----  
 SFOL 600.1524006 MHz  
 NUC2 1H  
 CPDPRG2 waltz16  
 PCPD2 70.00 usec  
 PLW2 22.60000038 W  
 PLW12 0.55806002 W  
 PLW13 0.25874999 W

F2 - Processing parameters  
 SI 32768  
 SF 150.9075359 MHz  
 WDW EM  
 SSB 0  
 LB 1.00 Hz  
 GB 0  
 PC 1.40

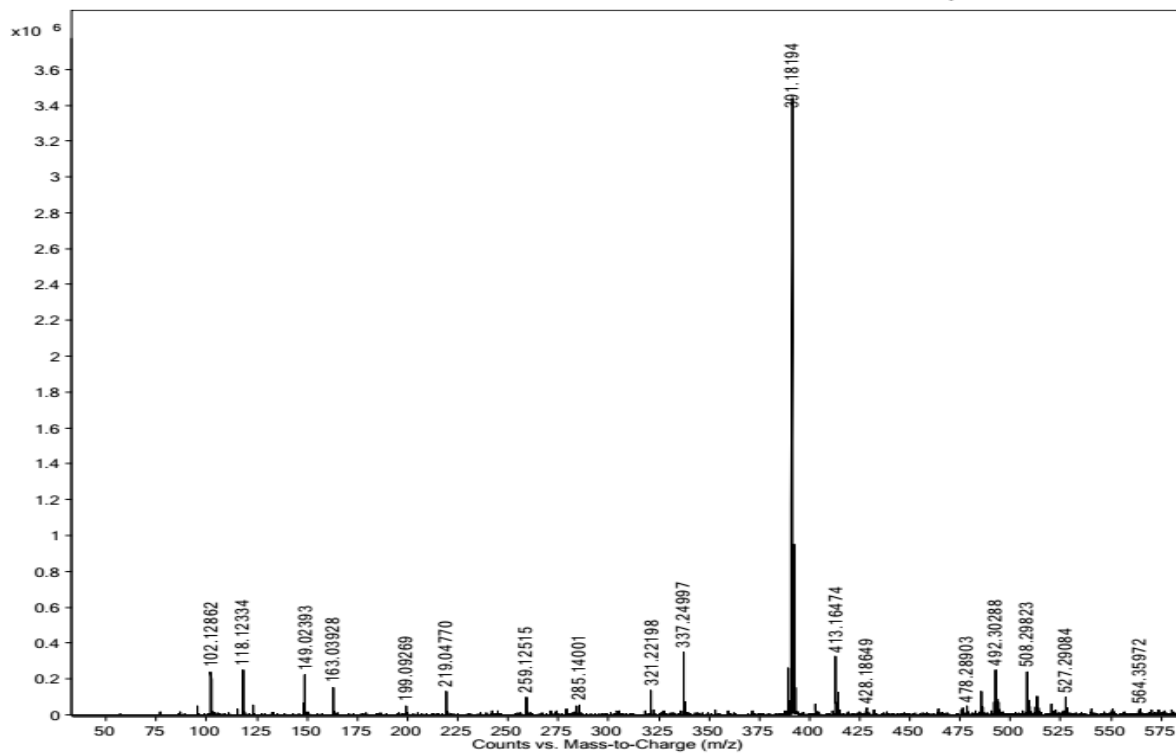

Figure S30: <sup>1</sup>H, <sup>13</sup>C NMR and HRMS (ESI<sup>+</sup>) of compound **5n**
